# Supplementary material for: Analyzing Knowledge Retrieval Impairments Associated with Alzheimer’s Disease Using Network Analyses
Source: Hindawi journal article supplement (doi:10.1155/2019/4203158), 2019-01-01
Supplement: f1 [file 4203158.f1.zip]

Archive with 5 entries (5 files):
- ad_graphs_usf_persev.json
- analysis.r
- correlation_matrix.pdf
- networks.zip
- ucsd_fluency_for_snafu_20180518.csv
