# Supplementary material for: Analyzing Knowledge Retrieval Impairments Associated with Alzheimer’s Disease Using Network Analyses
Source: Hindawi journal article supplement (doi:10.1155/2019/4203158), 2019-01-01
Supplement: f1 [file 4203158.f1.zip › ad_graphs_usf_persev.json]

{"ad_shuffled": {"clustering": [0.11272527472527473, 0.1797902494331066, 0.05270588235294118, 0.20291086633009237, 0.1627240404040404, 0.1599285714285714, 0.0889425287356322, 0.21846809251354707, 0.09916666666666667, 0.09224694551480266, 0.19996725670163168, 0.16233219558219555, 0.10573333333333332, 0.26834153220516854, 0.003333333333333333, 0.2128239711677212, 0.18092063492063493, 0.17900201855757414, 0.0991111111111111, 0.04860423280423281, 0.14681269841269842, 0.21049384484433503, 0.21197566137566137, 0.09883715999100615, 0.15143193843193842, 0.11382976282976282, 0.05918181818181818, 0.19356836219336215, 0.06615384615384616, 0.24205426748938105, 0.0928452587601524, 0.15011668408220133, 0.30727777777777776, 0.02878787878787879, 0.2675274344767245, 0.1454722222222222, 0.06250000000000001, 0.12978358917068591, 0.20119093753468753, 0.11178999025665691, 0.15225156325156325, 0.10594002525252527, 0.0880042735042735, 0.08362980030721966, 0.031850147968792035, 0.08323809523809522, 0.35247619047619055, 0.12577248677248679, 0.24145421245421247, 0.007777777777777777, 0.1185, 0.09251103471691705, 0.26631821487336194, 0.2767095226202369, 0.03177777777777777, 0.2632527472527472, 0.3310779756433352, 0.10767989417989417, 0.19570634752452937, 0.1475407219319668, 0.16461095751793425], "diameter": [6.0, 4.64, 11.02, 6.46, 5.74, 5.28, 8.36, 5.34, 4.68, 7.96, 6.06, 5.4, 5.12, 4.34, 14.92, 6.06, 4.84, 5.1, 6.4, 10.58, 6.28, 5.84, 4.46, 7.86, 6.68, 7.22, 11.0, 6.5, 6.86, 4.86, 7.48, 5.54, 3.7, 9.78, 4.74, 5.32, 10.12, 6.6, 5.76, 8.44, 5.68, 7.6, 7.46, 9.56, 10.52, 9.5, 3.28, 7.12, 5.58, 10.96, 5.56, 10.06, 4.56, 5.3, 12.34, 4.72, 4.16, 5.92, 5.46, 6.86, 6.2], "number_of_nodes": [13.0, 14.0, 17.0, 50.0, 25.0, 12.0, 29.0, 22.0, 12.0, 56.0, 32.0, 40.0, 10.0, 22.0, 16.0, 32.0, 12.0, 27.0, 15.0, 60.0, 15.0, 36.0, 15.0, 39.0, 27.0, 39.0, 22.0, 32.0, 13.0, 36.0, 47.0, 29.0, 16.0, 11.0, 29.0, 20.0, 20.0, 31.0, 32.0, 45.0, 33.0, 32.0, 26.0, 31.0, 59.0, 14.0, 7.0, 18.0, 13.0, 12.0, 12.0, 34.0, 32.0, 28.0, 15.0, 13.0, 27.0, 18.0, 33.0, 43.0, 43.0], "subs": ["14003", "14021", "2017", "2087", "2095", "2201", "2297", "2330", "2366", "2390", "2445", "2567", "2595", "2652", "2667", "2677", "2679", "2722", "2728", "2766", "2767", "2792", "2821", "2864", "2868", "2886", "2896", "2987", "3008", "3023", "3029", "3035", "3045", "3053", "3071", "3092", "3127", "3130", "3149", "3163", "3187", "3194", "3207", "3213", "3242", "3277", "3326", "653", "654", "8004", "8046", "8052", "8063", "8126", "8130", "8140", "8141", "8144", "8151", "8163", "8176"], "density": [0.19538461538461538, 0.21362637362637357, 0.1277941176470588, 0.08045714285714284, 0.1466, 0.233030303030303, 0.09379310344827588, 0.16233766233766234, 0.22757575757575754, 0.05997402597402598, 0.11358870967741935, 0.10656410256410254, 0.2471111111111111, 0.20363636363636367, 0.12566666666666668, 0.11173387096774193, 0.24030303030303027, 0.14763532763532763, 0.17352380952380947, 0.04870056497175141, 0.18152380952380953, 0.10717460317460317, 0.2224761904761905, 0.07314439946018894, 0.12005698005698004, 0.0914709851551957, 0.10311688311688312, 0.10548387096774194, 0.17564102564102557, 0.12853968253968254, 0.06571692876965772, 0.1275369458128079, 0.28966666666666663, 0.18618181818181817, 0.15192118226600987, 0.17221052631578945, 0.11410526315789475, 0.10262365591397851, 0.12189516129032256, 0.07, 0.12871212121212122, 0.09129032258064516, 0.10713846153846154, 0.08937634408602152, 0.045867913500876684, 0.15582417582417585, 0.4542857142857143, 0.15555555555555556, 0.1946153846153846, 0.16727272727272724, 0.2157575757575758, 0.07818181818181817, 0.16177419354838712, 0.14037037037037037, 0.13695238095238096, 0.23897435897435895, 0.1924786324786325, 0.16169934640522876, 0.11905303030303031, 0.08462901439645626, 0.0844518272425249], "median_degree": [2.0, 2.0, 2.0, 2.0, 3.0, 2.0, 2.0, 2.0, 2.0, 3.0, 2.0, 3.0, 2.0, 4.0, 2.0, 2.0, 2.0, 3.0, 2.0, 2.0, 2.0, 2.0, 2.0, 2.0, 2.0, 3.0, 2.0, 2.0, 2.0, 3.0, 2.0, 3.0, 4.0, 2.0, 3.0, 3.0, 2.0, 2.0, 3.0, 2.0, 4.0, 2.0, 2.0, 2.0, 2.0, 2.0, 3.0, 2.0, 2.0, 2.0, 2.0, 2.0, 4.0, 2.0, 2.0, 2.0, 4.0, 2.0, 3.0, 2.0, 2.0], "persev_data": [0.0, 0.17777777777777776, 0.15000000000000002, 0.08305813553491573, 0.02222222222222222, 0.2932692307692308, 0.28286380286380286, 0.21111111111111108, 0.037037037037037035, 0.08673128342245989, 0.10925582354153784, 0.16307446055345218, 0.1339285714285714, 0.1564509564509564, 0.0, 0.1001602564102564, 0.19090909090909094, 0.17327647842353724, 0.17619047619047618, 0.11629809818664308, 0.07692307692307693, 0.08630341880341881, 0.2874493927125506, 0.0990497076023392, 0.2208333333333333, 0.06734539969834089, 0.0, 0.16612091612091606, 0.0, 0.2320279393808806, 0.134311882647796, 0.04730392156862745, 0.1346153846153846, 0.0, 0.22556907378335952, 0.045454545454545456, 0.0, 0.12916666666666665, 0.08443223443223444, 0.1915032679738562, 0.13253458498023718, 0.014705882352941175, 0.059027777777777776, 0.05238095238095236, 0.011904761904761902, 0.125, 0.25, 0.07142857142857142, 0.0, 0.0, 0.125, 0.042328042328042326, 0.09560897435897436, 0.23547979797979796, 0.0625, 0.36396103896103904, 0.3117237182185358, 0.10512820512820512, 0.11822916666666665, 0.04421768707482994, 0.13180272108843538], "mean_degree": [2.3446153846153845, 2.777142857142857, 2.0447058823529414, 3.9424, 3.5184, 2.5633333333333335, 2.6262068965517242, 3.409090909090909, 2.5033333333333334, 3.2985714285714285, 3.52125, 4.156, 2.224, 4.276363636363636, 1.885, 3.46375, 2.6433333333333335, 3.8385185185185184, 2.429333333333333, 2.8733333333333335, 2.541333333333333, 3.7511111111111113, 3.1146666666666665, 2.7794871794871794, 3.1214814814814815, 3.4758974358974357, 2.1654545454545455, 3.27, 2.1076923076923078, 4.498888888888889, 3.0229787234042553, 3.5710344827586207, 4.345, 1.8618181818181818, 4.253793103448276, 3.272, 2.168, 3.0787096774193548, 3.77875, 3.08, 4.118787878787879, 2.83, 2.6784615384615384, 2.681290322580645, 2.6603389830508473, 2.025714285714286, 2.7257142857142855, 2.6444444444444444, 2.335384615384615, 1.84, 2.3733333333333335, 2.58, 5.015, 3.79, 1.9173333333333333, 2.8676923076923075, 5.004444444444444, 2.7488888888888887, 3.8096969696969696, 3.554418604651163, 3.5469767441860465], "numlists": [2.0, 3.0, 1.0, 9.0, 3.0, 2.0, 5.0, 6.0, 3.0, 8.0, 7.0, 7.0, 2.0, 6.0, 1.0, 8.0, 2.0, 8.0, 2.0, 7.0, 2.0, 10.0, 2.0, 6.0, 3.0, 5.0, 2.0, 6.0, 2.0, 9.0, 7.0, 6.0, 6.0, 1.0, 7.0, 4.0, 2.0, 6.0, 7.0, 5.0, 4.0, 4.0, 4.0, 4.0, 6.0, 1.0, 2.0, 2.0, 3.0, 1.0, 2.0, 6.0, 10.0, 8.0, 1.0, 4.0, 6.0, 2.0, 8.0, 7.0, 7.0], "persev_params": [0.0, 0.49, 0.033, 0.2986, 0.03560000000000001, 0.40259999999999996, 0.3422, 0.37760000000000005, 0.063, 0.35619999999999996, 0.4416, 0.5388000000000001, 0.2106, 0.49760000000000004, 0.0, 0.33199999999999996, 0.3202, 0.3356, 0.15460000000000002, 0.1182, 0.10100000000000002, 0.4484, 0.603, 0.23040000000000002, 0.49260000000000004, 0.2032, 0.0, 0.4648, 0.0, 0.5336, 0.187, 0.09860000000000001, 0.22280000000000005, 0.0, 0.5228, 0.10640000000000001, 0.0, 0.38040000000000007, 0.2974, 0.462, 0.5396, 0.023000000000000003, 0.09119999999999998, 0.0542, 0.0164, 0.030800000000000004, 0.42019999999999996, 0.09919999999999998, 0.0, 0.0, 0.16920000000000002, 0.0554, 0.34220000000000006, 0.4468, 0.01, 0.38160000000000005, 0.6412, 0.15039999999999998, 0.3912, 0.11599999999999999, 0.5058], "spl": [2.7789743589743585, 2.337362637362637, 4.497941176470588, 2.882710204081633, 2.7256, 2.5363636363636366, 3.539014778325123, 2.5457142857142854, 2.3557575757575755, 3.53, 2.720201612903226, 2.657435897435897, 2.4315555555555552, 2.2173160173160174, 5.651666666666667, 2.7670564516129024, 2.371212121212121, 2.516752136752137, 2.9100952380952383, 4.115559322033898, 2.8662857142857145, 2.6795873015873015, 2.289904761904762, 3.312043271485996, 3.0226780626780627, 3.1448582995951413, 4.491774891774892, 2.890766129032258, 3.1100000000000008, 2.452920634920635, 3.296244218316374, 2.642512315270936, 1.9505, 3.9461818181818185, 2.388472906403941, 2.542210526315789, 4.193263157894736, 2.967139784946237, 2.6748387096774193, 3.584545454545454, 2.618371212121212, 3.3215725806451615, 3.3251076923076925, 3.952, 4.3782232612507315, 3.9589010989010998, 1.7276190476190476, 3.138692810457516, 2.583040293040293, 4.327272727272727, 2.6330303030303024, 3.827878787878788, 2.289274193548387, 2.5199470899470895, 4.872571428571429, 2.3148717948717947, 2.158860398860399, 2.7826143790849676, 2.6252272727272725, 2.9980509413067553, 2.931317829457364], "smallworld": [0.6471272419787871, 0.964494812484211, 0.3496475833162418, 2.5263828858945363, 1.0672879765673855, 0.7247221605645849, 0.8961269087700577, 1.3150539648987065, 0.5197229292570171, 1.4846830388670247, 1.7900609714384677, 1.477357646648984, 0.5186075887074594, 1.3029992668101102, 0.016964982799991295, 1.9187123674651392, 0.8189151886510324, 1.1615163971724398, 0.6062357799786855, 0.9268063874257819, 0.8167908962121518, 2.007856552472813, 1.0334345374151217, 1.2379368750804565, 1.2299164076813474, 1.193121954357361, 0.5286879706842659, 1.8591934106332015, 0.3929889350712055, 1.8120903709869762, 1.412296904558591, 1.2032681441794353, 1.0946858484684927, 0.1360893028634812, 1.7223865032537813, 0.8609349837788236, 0.5108141546771351, 1.3254910123790231, 1.6377569638846687, 1.4999209286432438, 1.1540348469124828, 1.167210353955759, 0.8204113162665122, 0.8363038666583696, 0.66663096588139, 0.5092915341048561, 0.9575897748985344, 0.7847476596220347, 0.8875906455449631, 0.04000610326891725, 0.6178131900943769, 1.1672178453585587, 1.562217007417949, 1.879000567093098, 0.18162982846361556, 1.2407429773271188, 1.6800822274157658, 0.7121484040735127, 1.6385109252195251, 1.7633088610210979, 1.9445379578909077]}, "nc_shuffled": {"clustering": [0.07581818181818183, 0.08502139406487233, 0.1640125116381235, 0.12336156563742769, 0.19031286955379934, 0.13734850464299295, 0.18451046823691974, 0.12648253968253967, 0.1490988205694088, 0.21685966634030682, 0.18039593864168169, 0.10161371961371962, 0.1065261229070753, 0.0925617564253928, 0.1986811846362019, 0.08047633338883338, 0.06327618215118215, 0.05679203944203945, 0.1832902234601161, 0.058983503163503176, 0.049182795698924725, 0.14080639905330308, 0.22275584023573852, 0.23740018367153337, 0.09988288022250284, 0.2047567167012853, 0.08642830658620132, 0.18784611487802977, 0.1699963160033227, 0.10882014661465128, 0.13300329936344155, 0.1138432080739773, 0.2280929505734364, 0.10200461740333479, 0.15157608640268203, 0.15254957069771985, 0.11571499190612894, 0.2134502706719847, 0.10332414992414993, 0.17324921481955147, 0.0530077922077922, 0.21476533087447808, 0.09271852320881731, 0.2784077617716136, 0.14776456036122762, 0.05596279761904761, 0.12615857753357754, 0.2505803858790587, 0.03895238095238095, 0.1251945399416835, 0.1849076958816897, 0.11596278593201668, 0.17574157852729283, 0.10789664773946846, 0.12103702562213199, 0.19147381903001268, 0.15970781698357606, 0.2669936096103628, 0.2251480575125967, 0.07323677248677249, 0.055149425287356314, 0.13295911942463667, 0.09497749531792085, 0.11903806147556147, 0.12821004738002398, 0.07285537918871253, 0.16690396812840252, 0.11686524222589798, 0.1194613098318868, 0.04156334776334776, 0.06321667221667221, 0.006999999999999999, 0.0069696969696969695, 0.07660052910052909, 0.026444444444444444, 0.004545454545454544, 0.16881508645070734, 0.05210256410256411, 0.19184340747399226, 0.16943279586858717, 0.09320195268865049, 0.17187775187775187, 0.13759779553779553, 0.16939659451659453, 0.30531753402924905, 0.15437062301303786, 0.2870568317163403, 0.18939764678096807, 0.18599038368465615, 0.13209126984126984, 0.046984126984126975, 0.13154737659137672, 0.1422506889812728, 0.12070529100529102, 0.17478012502402748, 0.04159523809523809, 0.21301746241336084], "diameter": [9.52, 8.04, 7.06, 6.98, 6.44, 7.84, 6.22, 6.0, 6.34, 6.96, 5.52, 7.88, 7.78, 7.12, 5.88, 8.58, 8.76, 9.18, 6.52, 10.52, 10.02, 7.04, 6.28, 4.76, 9.74, 6.44, 8.36, 6.34, 6.72, 9.62, 8.3, 6.58, 6.36, 7.94, 6.0, 6.58, 7.78, 5.86, 7.58, 6.6, 10.72, 6.22, 8.18, 5.34, 7.62, 8.38, 6.02, 5.56, 12.16, 7.16, 6.34, 6.68, 5.54, 7.88, 6.9, 5.54, 7.14, 5.78, 5.88, 7.08, 10.36, 6.7, 7.32, 6.46, 6.98, 8.26, 7.02, 6.84, 9.06, 12.02, 9.14, 18.94, 20.92, 7.62, 14.7, 20.96, 6.24, 8.9, 6.92, 8.0, 9.2, 5.8, 5.9, 5.48, 5.02, 6.32, 5.7, 6.94, 6.58, 6.4, 10.98, 8.84, 7.1, 6.7, 4.92, 8.76, 5.62], "number_of_nodes": [22.0, 23.0, 98.0, 58.0, 64.0, 159.0, 73.0, 25.0, 51.0, 69.0, 52.0, 40.0, 63.0, 44.0, 51.0, 80.0, 72.0, 60.0, 83.0, 100.0, 31.0, 66.0, 70.0, 63.0, 53.0, 65.0, 57.0, 47.0, 57.0, 92.0, 82.0, 52.0, 68.0, 91.0, 52.0, 96.0, 105.0, 66.0, 60.0, 48.0, 55.0, 79.0, 100.0, 60.0, 85.0, 32.0, 32.0, 60.0, 48.0, 115.0, 70.0, 65.0, 42.0, 119.0, 47.0, 86.0, 92.0, 64.0, 65.0, 36.0, 29.0, 58.0, 47.0, 48.0, 82.0, 27.0, 65.0, 61.0, 93.0, 55.0, 39.0, 20.0, 22.0, 18.0, 18.0, 22.0, 54.0, 26.0, 70.0, 79.0, 118.0, 54.0, 50.0, 50.0, 88.0, 64.0, 66.0, 84.0, 60.0, 24.0, 27.0, 121.0, 70.0, 30.0, 41.0, 26.0, 58.0], "subs": ["14003", "14021", "2004", "2007", "2011", "2015", "2016", "2032", "2053", "2060", "2080", "2086", "2090", "2093", "2099", "2115", "2146", "2157", "2172", "2294", "2366", "2367", "2408", "2423", "2444", "2447", "2449", "2452", "2456", "2461", "2462", "2481", "2491", "2495", "2501", "2544", "2558", "2559", "2566", "2568", "2570", "2573", "2575", "2579", "2583", "2589", "2595", "2598", "2603", "2608", "2611", "2621", "2628", "2634", "2636", "2645", "2650", "2656", "2663", "2664", "2667", "2670", "2679", "2728", "2754", "2767", "2820", "2821", "2824", "2894", "2896", "2951", "3008", "3127", "5", "6", "603", "6079", "610", "617", "618", "628", "641", "644", "647", "653", "654", "8011", "8027", "8046", "8052", "8094", "8130", "8141", "8144", "8145", "93"], "density": [0.11134199134199135, 0.11786561264822135, 0.051184515043130666, 0.06686025408348457, 0.08215277777777778, 0.034126263832497415, 0.07771689497716894, 0.13313333333333335, 0.08307450980392156, 0.07855072463768116, 0.10205128205128204, 0.07838461538461539, 0.060829493087557605, 0.08014799154334039, 0.10210196078431373, 0.04446835443037975, 0.04799687010954616, 0.050937853107344624, 0.06419042021745519, 0.031563636363636356, 0.07965591397849463, 0.06440093240093239, 0.07601656314699794, 0.12235535074244754, 0.05746008708272859, 0.07057692307692308, 0.06037593984962406, 0.09461609620721553, 0.07230576441102757, 0.037611084567606305, 0.04823246010237879, 0.07704374057315234, 0.07628621597892887, 0.045103785103785106, 0.0820814479638009, 0.05453508771929824, 0.041882783882783874, 0.08051282051282051, 0.059830508474576265, 0.087322695035461, 0.04979124579124579, 0.0724115546900357, 0.03899393939393939, 0.09143502824858757, 0.049775910364145644, 0.08721774193548386, 0.1120967741935484, 0.11198870056497176, 0.052322695035461, 0.04100076277650648, 0.07092339544513458, 0.06716346153846153, 0.109732868757259, 0.03564164648910412, 0.07772432932469936, 0.08059097127222982, 0.050974677496416626, 0.09257936507936507, 0.08000961538461539, 0.08593650793650792, 0.0829064039408867, 0.07126436781609194, 0.07491211840888065, 0.08457446808510637, 0.05404396266184884, 0.09914529914529917, 0.0674326923076923, 0.06748633879781421, 0.04399719495091164, 0.04496969696969698, 0.06982456140350879, 0.10031578947368419, 0.09125541125541126, 0.1450980392156863, 0.11372549019607842, 0.09116883116883118, 0.08368972746331238, 0.09618461538461537, 0.07039337474120083, 0.059883154819863685, 0.034347385194842824, 0.0906219426974144, 0.08501224489795918, 0.09364897959183674, 0.09176593521421106, 0.06923611111111111, 0.09145920745920746, 0.05968445209409065, 0.08544632768361582, 0.13065217391304348, 0.08524216524216521, 0.03650137741046832, 0.05861697722567287, 0.11135632183908045, 0.12526829268292683, 0.09741538461538461, 0.09744706594071387], "median_degree": [2.0, 2.0, 3.0, 3.0, 3.0, 3.0, 4.0, 3.0, 3.0, 3.0, 4.0, 2.0, 2.0, 3.0, 4.0, 2.0, 2.0, 2.0, 4.0, 2.0, 2.0, 3.0, 3.0, 6.0, 2.0, 3.0, 2.0, 3.0, 3.0, 2.0, 2.0, 3.0, 3.0, 3.0, 3.0, 4.0, 3.0, 3.0, 2.0, 3.0, 2.0, 3.0, 2.0, 3.0, 2.0, 2.0, 3.0, 5.0, 2.0, 3.0, 3.0, 3.0, 4.0, 3.0, 3.0, 5.0, 2.0, 3.0, 3.0, 2.0, 2.0, 3.0, 2.0, 3.0, 3.0, 2.0, 2.0, 3.0, 2.0, 2.0, 2.0, 2.0, 2.0, 2.0, 2.0, 2.0, 3.0, 2.0, 3.0, 3.0, 2.0, 4.0, 3.0, 4.0, 5.0, 3.0, 4.0, 3.0, 4.0, 2.0, 2.0, 2.0, 2.0, 3.0, 4.0, 2.0, 4.0], "persev_data": [0.03125, 0.0945378151260504, 0.023359706201321107, 0.03900850611376927, 0.013928571428571427, 0.027056020887178317, 0.013528138528138526, 0.068218954248366, 0.01545530492898914, 0.03311355311355312, 0.01636904761904762, 0.03333333333333333, 0.05483975089238246, 0.026988636363636367, 0.03824189608503334, 0.01363636363636364, 0.0, 0.02086956521739131, 0.03676712779973649, 0.023835701197020533, 0.0, 0.01660628019323672, 0.038820561962976834, 0.030175725375000736, 0.03390293916609705, 0.005952380952380951, 0.006666666666666666, 0.01628151260504201, 0.009090909090909092, 0.017192982456140347, 0.033631677523080244, 0.04632528180354267, 0.08260233918128655, 0.01001602564102564, 0.02708333333333333, 0.03214070210725729, 0.02340267183659632, 0.020847362514029175, 0.01754385964912281, 0.03151515151515152, 0.02662570404505888, 0.04448784298408359, 0.01665787087781973, 0.09749891819869969, 0.018551056786350908, 0.02173913043478261, 0.06818181818181818, 0.01720593294077177, 0.04999999999999999, 0.03848764049913475, 0.013636363636363637, 0.033134920634920635, 0.0, 0.012351190476190477, 0.030994152046783623, 0.0085548354779124, 0.04326528607421056, 0.02297794117647059, 0.07723119351408825, 0.02898550724637681, 0.02941176470588235, 0.033628207541251016, 0.06395989974937343, 0.06335152261925715, 0.03618796662274923, 0.02564102564102564, 0.0820951056458303, 0.028442317916002123, 0.021466861598440547, 0.010526315789473686, 0.017857142857142856, 0.0, 0.0, 0.09999999999999998, 0.052631578947368425, 0.0, 0.015546218487394957, 0.0, 0.01651416122004357, 0.011532372146182886, 0.013701675001984602, 0.02001488095238095, 0.025967697020328594, 0.04249817251461989, 0.02749772372450391, 0.06217499500859756, 0.049645028174439935, 0.04135962077138547, 0.1019902858168439, 0.09215686274509803, 0.026315789473684213, 0.026747440593594435, 0.05810457516339869, 0.07342995169082124, 0.08544117647058826, 0.0, 0.02109328579916815], "mean_degree": [2.3381818181818184, 2.59304347826087, 4.9648979591836735, 3.811034482758621, 5.175625, 5.391949685534591, 5.595616438356164, 3.1952, 4.153725490196078, 5.341449275362319, 5.204615384615384, 3.057, 3.7714285714285714, 3.4463636363636363, 5.105098039215687, 3.513, 3.4077777777777776, 3.005333333333333, 5.263614457831325, 3.1248, 2.3896774193548387, 4.1860606060606065, 5.2451428571428576, 7.586031746031746, 2.9879245283018867, 4.516923076923077, 3.3810526315789473, 4.3523404255319145, 4.049122807017544, 3.422608695652174, 3.906829268292683, 3.9292307692307693, 5.111176470588235, 4.059340659340659, 4.186153846153847, 5.180833333333333, 4.355809523809524, 5.233333333333333, 3.53, 4.104166666666667, 2.688727272727273, 5.648101265822785, 3.8604, 5.394666666666667, 4.181176470588236, 2.70375, 3.475, 6.607333333333333, 2.4591666666666665, 4.674086956521739, 4.893714285714286, 4.298461538461538, 4.499047619047619, 4.2057142857142855, 3.5753191489361704, 6.850232558139535, 4.638695652173913, 5.8325, 5.120615384615385, 3.0077777777777777, 2.3213793103448275, 4.062068965517241, 3.4459574468085106, 3.975, 4.377560975609756, 2.577777777777778, 4.3156923076923075, 4.049180327868853, 4.047741935483871, 2.4283636363636365, 2.6533333333333333, 1.906, 1.9163636363636363, 2.466666666666667, 1.9333333333333333, 1.9145454545454546, 4.435555555555555, 2.4046153846153846, 4.857142857142857, 4.670886075949367, 4.01864406779661, 4.802962962962963, 4.1656, 4.5888, 7.983636363636363, 4.361875, 5.944848484848485, 4.953809523809523, 5.041333333333333, 3.005, 2.216296296296296, 4.380165289256198, 4.0445714285714285, 3.2293333333333334, 5.010731707317073, 2.4353846153846153, 5.55448275862069], "numlists": [2.0, 2.0, 14.0, 6.0, 10.0, 19.0, 11.0, 3.0, 7.0, 15.0, 8.0, 5.0, 6.0, 4.0, 9.0, 7.0, 5.0, 4.0, 12.0, 7.0, 2.0, 9.0, 13.0, 12.0, 5.0, 14.0, 6.0, 8.0, 10.0, 10.0, 13.0, 5.0, 12.0, 8.0, 10.0, 13.0, 12.0, 12.0, 6.0, 10.0, 3.0, 14.0, 9.0, 17.0, 11.0, 2.0, 5.0, 17.0, 4.0, 12.0, 10.0, 8.0, 7.0, 16.0, 6.0, 13.0, 12.0, 16.0, 12.0, 3.0, 2.0, 7.0, 5.0, 5.0, 11.0, 3.0, 9.0, 7.0, 10.0, 5.0, 4.0, 1.0, 1.0, 2.0, 1.0, 1.0, 7.0, 2.0, 15.0, 13.0, 13.0, 8.0, 6.0, 8.0, 26.0, 9.0, 20.0, 17.0, 10.0, 3.0, 2.0, 13.0, 10.0, 3.0, 6.0, 2.0, 11.0], "persev_params": [0.022000000000000002, 0.092, 0.0756, 0.10979999999999998, 0.046400000000000004, 0.0808, 0.039400000000000004, 0.1244, 0.0462, 0.07719999999999999, 0.047, 0.04479999999999999, 0.1352, 0.0536, 0.124, 0.025600000000000005, 0.0, 0.0318, 0.12580000000000002, 0.038200000000000005, 0.0, 0.0496, 0.1504, 0.11779999999999999, 0.0454, 0.014199999999999999, 0.016800000000000002, 0.043199999999999995, 0.019799999999999998, 0.03, 0.086, 0.1294, 0.235, 0.025600000000000005, 0.0836, 0.1328, 0.0716, 0.0702, 0.0404, 0.0848, 0.024400000000000005, 0.15440000000000004, 0.037000000000000005, 0.25880000000000003, 0.05399999999999999, 0.0178, 0.1932, 0.06680000000000001, 0.012000000000000002, 0.1324, 0.044199999999999996, 0.1096, 0.0, 0.044, 0.08539999999999999, 0.0278, 0.1324, 0.0686, 0.26, 0.046000000000000006, 0.018800000000000004, 0.10400000000000001, 0.17339999999999997, 0.21300000000000005, 0.14520000000000002, 0.027600000000000003, 0.2788, 0.08860000000000001, 0.048600000000000004, 0.012400000000000001, 0.0182, 0.0, 0.0, 0.08719999999999999, 0.01, 0.0, 0.0386, 0.0, 0.059000000000000004, 0.0406, 0.0266, 0.0542, 0.07400000000000001, 0.1356, 0.10120000000000001, 0.2414, 0.16219999999999998, 0.1232, 0.39659999999999995, 0.3378, 0.018200000000000004, 0.06860000000000001, 0.2046, 0.12159999999999999, 0.38079999999999997, 0.0, 0.07339999999999999], "spl": [4.019134199134199, 3.4694071146245062, 2.9825920471281298, 3.079286146400485, 2.760446428571429, 3.1578807419791417, 2.7163774733637753, 2.8157333333333328, 2.8714196078431375, 2.8177664109121907, 2.581161387631976, 3.3967435897435894, 3.2335176651305684, 3.1676532769556025, 2.6173333333333333, 3.5767974683544304, 3.6599608763693277, 3.9204971751412434, 2.8429150749338823, 4.091155555555556, 4.279440860215054, 3.0120093240093233, 2.741962732919254, 2.3130773169482843, 3.7695500725689395, 2.8462788461538464, 3.4256892230576437, 2.7906197964847372, 2.94595238095238, 3.6977400860009557, 3.2889310448660045, 2.9764705882352946, 2.7936786654960493, 3.3144420024420027, 2.794871794871795, 2.9197412280701753, 3.2641282051282055, 2.715449883449884, 3.304338983050847, 2.857304964539007, 4.383582491582491, 2.7634079844206423, 3.4295636363636355, 2.5774011299435027, 3.162028011204481, 3.663870967741935, 2.7794758064516127, 2.4495254237288133, 4.815868794326241, 3.1435118230358507, 2.812215320910972, 2.999221153846153, 2.602439024390244, 3.362737501780373, 3.0848843663274743, 2.596093023255814, 3.0410272336359294, 2.626746031746032, 2.712615384615384, 3.295015873015873, 4.347389162561576, 2.9798790078644886, 3.1870120259019425, 2.9206737588652487, 3.0567419451972295, 3.5236467236467233, 2.985663461538461, 3.027508196721312, 3.4489621318373076, 4.924781144781145, 3.8144129554655875, 6.994315789473684, 7.658268398268399, 3.3239215686274513, 5.681176470588236, 7.6615584415584435, 2.8115443745632422, 3.8651692307692302, 2.9096977225672873, 3.06466082440766, 3.532632188903375, 2.670524109014675, 2.8292081632653066, 2.6723102040816324, 2.4374764890282132, 2.8791567460317458, 2.5734918414918417, 2.9099598393574295, 2.778870056497175, 2.9176086956521736, 4.559886039886041, 3.376184573002755, 3.081714285714286, 3.0189425287356317, 2.4507560975609755, 3.818707692307693, 2.5625287356321835], "smallworld": [0.5987806511148264, 0.6811439491718602, 3.0970470930499503, 1.8292916914107566, 2.15905508725327, 3.813813769452775, 2.2006645163421856, 0.9618496720593062, 1.749407342473407, 2.469742464577154, 1.6659320620170335, 1.2572941737535648, 1.712088800391884, 1.1275633475080413, 1.8163313235587228, 1.7831952021400852, 1.2648931886229429, 1.0502768301791914, 2.69726222613007, 1.8447942384877924, 0.5782293542746229, 2.138553881172731, 2.7764979681410735, 1.744278322807388, 1.6839888948458972, 2.8457968486802034, 1.4104074492683814, 1.9030392407535173, 2.334824584705193, 2.893483355248895, 2.7109444133177014, 1.4534249796308678, 2.738367293652169, 2.2250063605662866, 1.83618813940859, 2.6677749908232165, 2.6779144641625567, 2.514803855209904, 1.7193208542221017, 1.9136982446915582, 1.0042965016586796, 2.7137453220386774, 2.371813395960581, 2.8362961729101572, 2.9455169612642775, 0.6090040789516067, 1.1465128137953184, 2.0048474391074023, 0.665926916270998, 3.0153429370431213, 2.5145642856331576, 1.6640594656184746, 1.5640270930270632, 3.0104190036478076, 1.5526928692641522, 2.1358229765161614, 3.0412708023209984, 2.624445832200465, 2.641569578846265, 0.8611954754794179, 0.6116272537152481, 1.8414250944896002, 1.2529729364493551, 1.3797562739125362, 2.3130233273534113, 0.7247046661465479, 2.363904095472499, 1.7053948018740857, 2.5534858645970635, 0.8531639919497515, 0.8867378618728019, 0.04381222840091609, 0.04366138492805011, 0.5062336363203026, 0.17368249392351065, 0.027983686719278342, 1.9536025344442722, 0.5421750574978533, 2.5439938456067885, 2.6501627298446095, 2.633906312516832, 1.8203622619165813, 1.5955836668099195, 1.7431461058109299, 2.9594973291204076, 2.2003255472287266, 2.8868801689417, 3.0232771394694073, 2.0018951330057813, 1.0154126824263685, 0.49711999570906173, 3.4803591415000272, 2.4172371458508146, 1.0633878636577045, 1.3408298446861147, 0.4042864930143215, 2.0528311952745373]}, "nc": {"clustering": [0.0, 0.0, 0.16283181104609676, 0.08822087873812011, 0.14443768037518034, 0.1318786081296335, 0.12548083575480834, 0.1026666666666667, 0.11139122315592904, 0.12232365058452017, 0.10642551892551891, 0.020436507936507937, 0.16712247188437668, 0.12373737373737376, 0.18640890699714233, 0.06928300865800865, 0.07519841269841271, 0.04523809523809524, 0.11749890002902051, 0.0890952380952381, 0.05376344086021505, 0.015343915343915344, 0.15005692719978433, 0.22310643501119692, 0.048337825696316256, 0.18711493634570553, 0.09908103592314119, 0.17034785545423844, 0.14212454212454212, 0.1382045490741143, 0.009842325695984231, 0.16254578754578755, 0.18634510913922683, 0.030263387406244548, 0.06518620268620269, 0.1884421712546713, 0.120155981584553, 0.08767873540600814, 0.058888888888888886, 0.10423881673881673, 0.11636363636363636, 0.1342926019955059, 0.07882251082251082, 0.2732067007067007, 0.0634801799507682, 0.03958333333333334, 0.04791666666666667, 0.1984225034225034, 0.0, 0.1680861650426868, 0.12866522366522365, 0.11265734265734266, 0.10748299319727889, 0.07738759839600175, 0.14245187436676798, 0.1339306688143897, 0.178531613314222, 0.1362348588911089, 0.1457477565169873, 0.06759259259259259, 0.11609195402298851, 0.20257252326217845, 0.04249792760431058, 0.14503968253968255, 0.13939529305382967, 0.0, 0.11992562992562991, 0.10586781160551652, 0.10536715375425054, 0.08484848484848485, 0.059829059829059825, 0.11666666666666667, 0.0, 0.12037037037037036, 0.0, 0.0, 0.09229864785420341, 0.0, 0.06111317254174397, 0.12009839668067515, 0.10590468853180719, 0.14595569040013484, 0.11793650793650795, 0.10713997113997113, 0.19579300861052198, 0.1781058351370851, 0.17777845050572322, 0.04698258091115234, 0.24488807488807487, 0.09722222222222221, 0.05555555555555555, 0.08970162069335626, 0.07060090702947847, 0.09888888888888889, 0.22144792876500194, 0.038461538461538464, 0.17372193391463167], "diameter": [12.0, 9.0, 8.0, 9.0, 9.0, 11.0, 10.0, 7.0, 8.0, 11.0, 6.0, 9.0, 13.0, 7.0, 10.0, 17.0, 8.0, 11.0, 7.0, 16.0, 12.0, 10.0, 8.0, 5.0, 17.0, 11.0, 9.0, 6.0, 10.0, 15.0, 11.0, 12.0, 8.0, 12.0, 7.0, 9.0, 10.0, 8.0, 13.0, 6.0, 16.0, 9.0, 11.0, 7.0, 15.0, 9.0, 7.0, 8.0, 14.0, 10.0, 7.0, 12.0, 7.0, 10.0, 10.0, 8.0, 10.0, 10.0, 8.0, 8.0, 14.0, 7.0, 7.0, 7.0, 12.0, 9.0, 9.0, 10.0, 20.0, 13.0, 8.0, 18.0, 21.0, 6.0, 14.0, 21.0, 10.0, 11.0, 10.0, 12.0, 10.0, 6.0, 7.0, 5.0, 7.0, 8.0, 7.0, 9.0, 9.0, 7.0, 14.0, 14.0, 9.0, 8.0, 6.0, 9.0, 5.0], "number_of_nodes": [22.0, 23.0, 98.0, 58.0, 64.0, 159.0, 73.0, 25.0, 51.0, 69.0, 52.0, 40.0, 63.0, 44.0, 51.0, 80.0, 72.0, 60.0, 83.0, 100.0, 31.0, 66.0, 70.0, 63.0, 53.0, 65.0, 57.0, 47.0, 57.0, 92.0, 82.0, 52.0, 68.0, 91.0, 52.0, 96.0, 105.0, 66.0, 60.0, 48.0, 55.0, 79.0, 100.0, 60.0, 85.0, 32.0, 32.0, 60.0, 48.0, 115.0, 70.0, 65.0, 42.0, 119.0, 47.0, 86.0, 92.0, 64.0, 65.0, 36.0, 29.0, 58.0, 47.0, 48.0, 82.0, 27.0, 65.0, 61.0, 93.0, 55.0, 39.0, 20.0, 22.0, 18.0, 18.0, 22.0, 54.0, 26.0, 70.0, 79.0, 118.0, 54.0, 50.0, 50.0, 88.0, 64.0, 66.0, 84.0, 60.0, 24.0, 27.0, 121.0, 70.0, 30.0, 41.0, 26.0, 58.0], "subs": ["14003", "14021", "2004", "2007", "2011", "2015", "2016", "2032", "2053", "2060", "2080", "2086", "2090", "2093", "2099", "2115", "2146", "2157", "2172", "2294", "2366", "2367", "2408", "2423", "2444", "2447", "2449", "2452", "2456", "2461", "2462", "2481", "2491", "2495", "2501", "2544", "2558", "2559", "2566", "2568", "2570", "2573", "2575", "2579", "2583", "2589", "2595", "2598", "2603", "2608", "2611", "2621", "2628", "2634", "2636", "2645", "2650", "2656", "2663", "2664", "2667", "2670", "2679", "2728", "2754", "2767", "2820", "2821", "2824", "2894", "2896", "2951", "3008", "3127", "5", "6", "603", "6079", "610", "617", "618", "628", "641", "644", "647", "653", "654", "8011", "8027", "8046", "8052", "8094", "8130", "8141", "8144", "8145", "93"], "density": [0.1038961038961039, 0.10276679841897234, 0.046286555859457186, 0.05928614640048397, 0.06696428571428571, 0.02842130403630284, 0.05098934550989345, 0.12666666666666668, 0.06980392156862746, 0.051577152600170505, 0.08069381598793364, 0.06923076923076923, 0.05632360471070148, 0.07188160676532769, 0.08392156862745098, 0.0379746835443038, 0.041471048513302036, 0.04463276836158192, 0.0526006464883926, 0.028888888888888888, 0.07311827956989247, 0.04195804195804196, 0.05714285714285714, 0.08858166922683051, 0.04499274310595065, 0.05961538461538462, 0.05576441102756892, 0.0786308973172988, 0.05200501253132832, 0.033205924510272336, 0.03643480879253237, 0.05731523378582202, 0.06321334503950835, 0.0380952380952381, 0.06033182503770739, 0.04451754385964912, 0.03553113553113553, 0.05827505827505827, 0.04067796610169491, 0.07535460992907801, 0.04579124579124579, 0.06004543979227524, 0.032929292929292926, 0.07966101694915254, 0.037815126050420166, 0.07459677419354839, 0.09274193548387097, 0.07457627118644068, 0.04609929078014184, 0.03646071700991609, 0.0567287784679089, 0.058653846153846154, 0.08362369337979095, 0.031476997578692496, 0.0666049953746531, 0.046785225718194254, 0.04228380315336837, 0.06646825396825397, 0.06201923076923077, 0.0873015873015873, 0.0812807881773399, 0.05868118572292801, 0.07215541165587419, 0.06826241134751773, 0.04938271604938271, 0.08547008547008547, 0.06009615384615385, 0.05792349726775956, 0.033660589060308554, 0.041750841750841754, 0.06612685560053981, 0.10526315789473684, 0.09090909090909091, 0.13725490196078433, 0.1111111111111111, 0.09090909090909091, 0.061495457721872815, 0.08615384615384615, 0.047619047619047616, 0.04771178188899708, 0.030856149500217298, 0.07617051013277429, 0.07755102040816327, 0.0783673469387755, 0.06269592476489028, 0.06398809523809523, 0.07179487179487179, 0.03843947217441193, 0.07570621468926554, 0.10869565217391304, 0.08262108262108261, 0.03016528925619835, 0.04803312629399586, 0.09885057471264368, 0.11829268292682926, 0.09230769230769231, 0.08711433756805807], "median_degree": [2.0, 2.0, 3.0, 2.5, 2.5, 3.0, 3.0, 2.0, 3.0, 2.0, 4.0, 2.0, 2.0, 3.0, 3.0, 2.0, 2.0, 2.0, 3.0, 2.0, 2.0, 2.0, 3.0, 5.0, 2.0, 3.0, 2.0, 3.0, 2.0, 2.0, 2.0, 2.5, 2.0, 2.0, 2.0, 3.0, 2.0, 3.0, 2.0, 3.0, 2.0, 3.0, 2.0, 3.0, 2.0, 2.0, 2.5, 4.0, 2.0, 3.0, 2.5, 4.0, 3.0, 2.0, 3.0, 4.0, 2.5, 2.5, 2.0, 3.0, 2.0, 2.0, 2.0, 3.0, 3.0, 2.0, 2.0, 3.0, 2.0, 2.0, 2.0, 2.0, 2.0, 2.0, 2.0, 2.0, 3.0, 2.0, 2.0, 2.0, 2.0, 3.0, 4.0, 2.5, 4.0, 3.0, 3.0, 2.0, 4.0, 2.0, 2.0, 2.0, 2.0, 2.5, 4.0, 2.0, 3.5], "persev_data": [0.03125, 0.09453781512605042, 0.023359706201321107, 0.03900850611376927, 0.013928571428571429, 0.027056020887178314, 0.013528138528138528, 0.068218954248366, 0.015455304928989139, 0.033113553113553115, 0.016369047619047616, 0.03333333333333333, 0.054839750892382466, 0.026988636363636364, 0.03824189608503334, 0.013636363636363637, 0.0, 0.020869565217391306, 0.03676712779973649, 0.023835701197020536, 0.0, 0.016606280193236716, 0.03882056196297683, 0.030175725375000736, 0.03390293916609706, 0.005952380952380952, 0.006666666666666667, 0.016281512605042014, 0.00909090909090909, 0.01719298245614035, 0.03363167752308024, 0.04632528180354267, 0.08260233918128655, 0.01001602564102564, 0.02708333333333333, 0.032140702107257293, 0.02340267183659632, 0.020847362514029178, 0.017543859649122806, 0.03151515151515152, 0.026625704045058884, 0.04448784298408359, 0.016657870877819725, 0.09749891819869967, 0.018551056786350904, 0.021739130434782608, 0.06818181818181818, 0.017205932940771766, 0.05, 0.03848764049913475, 0.013636363636363636, 0.033134920634920635, 0.0, 0.012351190476190476, 0.030994152046783626, 0.0085548354779124, 0.04326528607421057, 0.02297794117647059, 0.07723119351408825, 0.028985507246376812, 0.029411764705882353, 0.033628207541251016, 0.06395989974937343, 0.06335152261925717, 0.03618796662274923, 0.025641025641025644, 0.08209510564583028, 0.028442317916002127, 0.021466861598440544, 0.010526315789473684, 0.017857142857142856, 0.0, 0.0, 0.1, 0.05263157894736842, 0.0, 0.015546218487394958, 0.0, 0.016514161220043573, 0.011532372146182886, 0.0137016750019846, 0.02001488095238095, 0.025967697020328598, 0.04249817251461988, 0.02749772372450391, 0.06217499500859755, 0.04964502817443993, 0.041359620771385476, 0.10199028581684391, 0.09215686274509804, 0.02631578947368421, 0.026747440593594442, 0.05810457516339869, 0.07342995169082125, 0.08544117647058824, 0.0, 0.02109328579916815], "mean_degree": [2.1818181818181817, 2.260869565217391, 4.489795918367347, 3.3793103448275863, 4.21875, 4.490566037735849, 3.671232876712329, 3.04, 3.4901960784313726, 3.5072463768115942, 4.115384615384615, 2.7, 3.492063492063492, 3.090909090909091, 4.196078431372549, 3.0, 2.9444444444444446, 2.6333333333333333, 4.313253012048193, 2.86, 2.193548387096774, 2.727272727272727, 3.942857142857143, 5.492063492063492, 2.339622641509434, 3.8153846153846156, 3.1228070175438596, 3.617021276595745, 2.912280701754386, 3.0217391304347827, 2.951219512195122, 2.923076923076923, 4.235294117647059, 3.4285714285714284, 3.076923076923077, 4.229166666666667, 3.6952380952380954, 3.787878787878788, 2.4, 3.5416666666666665, 2.4727272727272727, 4.6835443037974684, 3.26, 4.7, 3.176470588235294, 2.3125, 2.875, 4.4, 2.1666666666666665, 4.156521739130435, 3.914285714285714, 3.753846153846154, 3.4285714285714284, 3.7142857142857144, 3.0638297872340425, 3.9767441860465116, 3.847826086956522, 4.1875, 3.9692307692307693, 3.0555555555555554, 2.2758620689655173, 3.3448275862068964, 3.3191489361702127, 3.2083333333333335, 4.0, 2.2222222222222223, 3.8461538461538463, 3.4754098360655736, 3.096774193548387, 2.2545454545454544, 2.5128205128205128, 2.0, 1.9090909090909092, 2.3333333333333335, 1.8888888888888888, 1.9090909090909092, 3.259259259259259, 2.1538461538461537, 3.2857142857142856, 3.721518987341772, 3.610169491525424, 4.037037037037037, 3.8, 3.84, 5.454545454545454, 4.03125, 4.666666666666667, 3.1904761904761907, 4.466666666666667, 2.5, 2.1481481481481484, 3.6198347107438016, 3.3142857142857145, 2.8666666666666667, 4.7317073170731705, 2.3076923076923075, 4.9655172413793105], "numlists": [2.0, 2.0, 14.0, 6.0, 10.0, 19.0, 11.0, 3.0, 7.0, 15.0, 8.0, 5.0, 6.0, 4.0, 9.0, 7.0, 5.0, 4.0, 12.0, 7.0, 2.0, 9.0, 13.0, 12.0, 5.0, 14.0, 6.0, 8.0, 10.0, 10.0, 13.0, 5.0, 12.0, 8.0, 10.0, 13.0, 12.0, 12.0, 6.0, 10.0, 3.0, 14.0, 9.0, 17.0, 11.0, 2.0, 5.0, 17.0, 4.0, 12.0, 10.0, 8.0, 7.0, 16.0, 6.0, 13.0, 12.0, 16.0, 12.0, 3.0, 2.0, 7.0, 5.0, 5.0, 11.0, 3.0, 9.0, 7.0, 10.0, 5.0, 4.0, 1.0, 1.0, 2.0, 1.0, 1.0, 7.0, 2.0, 15.0, 13.0, 13.0, 8.0, 6.0, 8.0, 26.0, 9.0, 20.0, 17.0, 10.0, 3.0, 2.0, 13.0, 10.0, 3.0, 6.0, 2.0, 11.0], "persev_params": [0.02, 0.05, 0.1, 0.09, 0.03, 0.07, 0.02, 0.09, 0.04, 0.04, 0.04, 0.06, 0.07, 0.03, 0.08, 0.01, 0.0, 0.02, 0.11, 0.03, 0.0, 0.03, 0.1, 0.08, 0.02, 0.01, 0.01, 0.03, 0.01, 0.02, 0.0, 0.06, 0.16, 0.02, 0.0, 0.09, 0.07, 0.04, 0.02, 0.06, 0.02, 0.13, 0.02, 0.25, 0.03, 0.01, 0.1, 0.04, 0.01, 0.13, 0.03, 0.07, 0.0, 0.04, 0.06, 0.01, 0.09, 0.05, 0.16, 0.06, 0.01, 0.07, 0.21, 0.1, 0.1, 0.03, 0.41, 0.06, 0.03, 0.01, 0.02, 0.0, 0.0, 0.09, 0.01, 0.0, 0.02, 0.0, 0.0, 0.04, 0.02, 0.04, 0.07, 0.08, 0.07, 0.19, 0.14, 0.0, 0.45, 0.15, 0.01, 0.05, 0.14, 0.07, 0.25, 0.0, 0.08], "spl": [4.536796536796537, 3.8735177865612647, 3.2577319587628866, 3.768905021173624, 3.2222222222222223, 3.7482684499641747, 3.6274733637747336, 3.03, 3.256470588235294, 3.9092071611253196, 2.944193061840121, 3.673076923076923, 4.298515104966718, 3.429175475687104, 3.4211764705882355, 5.1835443037974684, 4.118153364632238, 4.581920903954802, 3.0861004995592123, 5.221818181818182, 5.008602150537635, 4.117016317016317, 3.2803312629399586, 2.5698924731182795, 5.856313497822931, 3.608173076923077, 3.9724310776942358, 3.115633672525439, 4.057017543859649, 4.751552795031056, 4.045769346582355, 4.3710407239819, 3.2151009657594383, 4.055921855921856, 3.368024132730015, 3.5032894736842106, 3.9108058608058607, 3.4941724941724943, 5.425423728813559, 3.148936170212766, 5.573063973063973, 3.234988640051931, 4.4228282828282826, 2.863276836158192, 4.5739495798319325, 4.050403225806452, 3.2963709677419355, 3.0327683615819208, 5.875, 3.7588100686498858, 3.202070393374741, 3.6533653846153844, 3.1823461091753775, 3.9213787209799174, 3.806660499537465, 3.5991792065663475, 3.6275680840898232, 3.3938492063492065, 3.4620192307692306, 3.4015873015873015, 5.593596059113301, 3.5063520871143377, 3.181313598519889, 3.37322695035461, 3.661547726588377, 3.9572649572649574, 3.4610576923076923, 3.7775956284153005, 5.620617110799439, 5.888888888888889, 3.9055330634278005, 6.905263157894737, 7.666666666666667, 3.0588235294117645, 5.450980392156863, 7.666666666666667, 3.710691823899371, 4.581538461538462, 3.9180124223602486, 3.810775722168127, 3.899029407503984, 2.9615653389238297, 3.119183673469388, 2.889795918367347, 2.9367816091954024, 3.1140873015873014, 2.935198135198135, 3.668387837062536, 3.2824858757062145, 3.510869565217391, 5.2079772079772075, 4.3615702479338845, 3.7681159420289854, 3.3563218390804597, 2.6134146341463413, 4.258461538461538, 2.692679975801573], "smallworld": [0.0, 0.0, 3.3307761271373595, 1.3396746115604656, 1.9646016940114386, 4.204264170417766, 2.2691768510754615, 0.8066931061137176, 1.5722551301377707, 2.0772129694860335, 1.2756512410000644, 0.30613149074697077, 2.32392798049922, 1.7225122955060086, 1.8155880641502813, 1.4216713673915948, 1.7682716673413459, 0.951259063880584, 2.214875137364607, 2.6144683959301545, 0.6631719425928576, 0.37663049564426354, 2.5149898910802655, 2.4223618695860902, 0.8733767950457376, 2.754195948344517, 1.6164098653265, 2.127607041621125, 2.593350095991807, 3.621083390930692, 0.2752386307932721, 2.4368853129979864, 2.7202444000466737, 0.7250268592679361, 1.1499043321260018, 3.864831093072144, 3.1085521185012794, 1.3754189704284094, 1.2690637890937997, 1.3733859423160069, 2.0557118962724323, 1.9815066703112267, 2.1303994475952477, 3.2226829957411627, 1.4275502521255914, 0.5590661751175574, 0.5309731154103222, 2.4654848917644685, 0.0, 4.120619124219424, 2.2371501398109794, 1.6850317333084808, 1.2550701068542711, 2.3028039147943202, 1.9739959262046491, 2.5966088225300745, 3.948669105393606, 1.7816526697666144, 2.0875774383659564, 0.751106166991679, 1.0828865260643563, 3.368961677379984, 0.6070634218215859, 2.136204071348883, 2.480831094491246, 0.0, 1.814643307403887, 1.6232620593858103, 2.2574848418050384, 1.732634300800059, 0.9453389334606184, 0.7302038066819349, 0.0, 1.0355676848352646, 0.0, 0.0, 1.3913740386382758, 0.0, 1.1867992483220116, 2.2244275740373745, 3.2992235653790227, 1.8843421780102971, 1.457852246426889, 1.4036206507777307, 2.838758965983482, 2.7088048050753044, 2.3297583415003436, 1.2877972639625386, 2.7415666983410203, 0.9220405836103771, 0.5779441581187199, 2.5628822192772898, 1.4030872223307373, 0.9957942077366074, 1.754244739475192, 0.39645893697852647, 1.9094314032334467]}, "ad": {"clustering": [0.07692307692307693, 0.2857142857142857, 0.0, 0.08023809523809526, 0.23685714285714288, 0.0, 0.13409961685823757, 0.21937229437229436, 0.0, 0.09954648526077096, 0.14712301587301588, 0.09831349206349205, 0.13333333333333336, 0.05, 0.0, 0.16488095238095238, 0.0, 0.22727807172251618, 0.3, 0.0906746031746032, 0.04444444444444444, 0.3179673721340388, 0.1311111111111111, 0.09999999999999999, 0.10864197530864199, 0.33934213934213936, 0.06818181818181818, 0.06249999999999999, 0.0, 0.20717399884066545, 0.044241810199257, 0.1607553366174056, 0.08124999999999999, 0.28787878787878785, 0.27391577320583405, 0.1383333333333333, 0.0, 0.0840757808499744, 0.07152777777777777, 0.08617283950617283, 0.13823953823953825, 0.090625, 0.020512820512820513, 0.04838709677419355, 0.012913640032284098, 0.23809523809523808, 0.19047619047619047, 0.0, 0.0, 0.0, 0.125, 0.11848739495798319, 0.2783933080808081, 0.15247887033601318, 0.0, 0.25641025641025644, 0.3498563165229832, 0.14629629629629629, 0.1041847041847042, 0.11698043558508675, 0.1425249169435216], "diameter": [7.0, 4.0, 12.0, 11.0, 7.0, 6.0, 9.0, 6.0, 5.0, 10.0, 6.0, 7.0, 5.0, 5.0, 15.0, 8.0, 5.0, 6.0, 6.0, 17.0, 7.0, 7.0, 4.0, 9.0, 9.0, 7.0, 12.0, 10.0, 8.0, 7.0, 7.0, 6.0, 6.0, 8.0, 5.0, 5.0, 12.0, 6.0, 5.0, 16.0, 6.0, 9.0, 8.0, 11.0, 12.0, 10.0, 3.0, 8.0, 5.0, 11.0, 8.0, 16.0, 5.0, 5.0, 10.0, 5.0, 4.0, 6.0, 7.0, 6.0, 7.0], "number_of_nodes": [13.0, 14.0, 17.0, 50.0, 25.0, 12.0, 29.0, 22.0, 12.0, 56.0, 32.0, 40.0, 10.0, 22.0, 16.0, 32.0, 12.0, 27.0, 15.0, 60.0, 15.0, 36.0, 15.0, 39.0, 27.0, 39.0, 22.0, 32.0, 13.0, 36.0, 47.0, 29.0, 16.0, 11.0, 29.0, 20.0, 20.0, 31.0, 32.0, 45.0, 33.0, 32.0, 26.0, 31.0, 59.0, 14.0, 7.0, 18.0, 13.0, 12.0, 12.0, 34.0, 32.0, 28.0, 15.0, 13.0, 27.0, 18.0, 33.0, 43.0, 43.0], "subs": ["14003", "14021", "2017", "2087", "2095", "2201", "2297", "2330", "2366", "2390", "2445", "2567", "2595", "2652", "2667", "2677", "2679", "2722", "2728", "2766", "2767", "2792", "2821", "2864", "2868", "2886", "2896", "2987", "3008", "3023", "3029", "3035", "3045", "3053", "3071", "3092", "3127", "3130", "3149", "3163", "3187", "3194", "3207", "3213", "3242", "3277", "3326", "653", "654", "8004", "8046", "8052", "8063", "8126", "8130", "8140", "8141", "8144", "8151", "8163", "8176"], "density": [0.1794871794871795, 0.21978021978021978, 0.11764705882352941, 0.0563265306122449, 0.15, 0.21212121212121213, 0.10344827586206896, 0.17316017316017315, 0.18181818181818182, 0.05584415584415584, 0.11290322580645161, 0.09487179487179487, 0.2222222222222222, 0.17316017316017315, 0.125, 0.09274193548387097, 0.19696969696969696, 0.1452991452991453, 0.18095238095238095, 0.04971751412429379, 0.1619047619047619, 0.10952380952380952, 0.22857142857142856, 0.06747638326585695, 0.09971509971509972, 0.09176788124156546, 0.09956709956709957, 0.07661290322580645, 0.16666666666666666, 0.12222222222222222, 0.06567992599444958, 0.11576354679802955, 0.2, 0.23636363636363636, 0.18472906403940886, 0.14736842105263157, 0.1, 0.0989247311827957, 0.0967741935483871, 0.06868686868686869, 0.10984848484848485, 0.07862903225806452, 0.09538461538461539, 0.07741935483870968, 0.04266510812390415, 0.16483516483516483, 0.42857142857142855, 0.12418300653594772, 0.15384615384615385, 0.16666666666666666, 0.18181818181818182, 0.0677361853832442, 0.16330645161290322, 0.1402116402116402, 0.13333333333333333, 0.23076923076923078, 0.18803418803418803, 0.1437908496732026, 0.10227272727272728, 0.07751937984496124, 0.08084163898117387], "median_degree": [2.0, 2.0, 2.0, 2.0, 3.0, 2.0, 2.0, 2.5, 1.0, 2.0, 2.5, 3.0, 2.0, 3.0, 2.0, 2.0, 2.0, 3.0, 2.0, 2.0, 2.0, 2.0, 2.0, 2.0, 2.0, 3.0, 2.0, 2.0, 2.0, 3.0, 2.0, 2.0, 3.0, 2.0, 4.0, 2.5, 2.0, 2.0, 2.0, 2.0, 3.0, 2.0, 2.0, 2.0, 2.0, 2.0, 3.0, 2.0, 2.0, 2.0, 2.0, 2.0, 4.5, 2.5, 2.0, 2.0, 4.0, 2.0, 3.0, 2.0, 3.0], "persev_data": [0.0, 0.17777777777777778, 0.15, 0.08305813553491573, 0.022222222222222223, 0.2932692307692308, 0.28286380286380286, 0.2111111111111111, 0.037037037037037035, 0.08673128342245989, 0.10925582354153782, 0.16307446055345215, 0.13392857142857142, 0.15645095645095644, 0.0, 0.10016025641025642, 0.19090909090909092, 0.17327647842353724, 0.17619047619047618, 0.11629809818664308, 0.07692307692307693, 0.08630341880341881, 0.2874493927125506, 0.09904970760233918, 0.22083333333333333, 0.06734539969834089, 0.0, 0.1661209161209161, 0.0, 0.23202793938088057, 0.13431188264779598, 0.04730392156862745, 0.1346153846153846, 0.0, 0.2255690737833595, 0.045454545454545456, 0.0, 0.12916666666666665, 0.08443223443223444, 0.19150326797385625, 0.13253458498023715, 0.014705882352941176, 0.059027777777777776, 0.052380952380952375, 0.011904761904761904, 0.125, 0.25, 0.07142857142857142, 0.0, 0.0, 0.125, 0.042328042328042326, 0.09560897435897436, 0.23547979797979796, 0.0625, 0.363961038961039, 0.3117237182185358, 0.10512820512820513, 0.11822916666666666, 0.04421768707482993, 0.13180272108843538], "mean_degree": [2.1538461538461537, 2.857142857142857, 1.8823529411764706, 2.76, 3.6, 2.3333333333333335, 2.896551724137931, 3.6363636363636362, 2.0, 3.0714285714285716, 3.5, 3.7, 2.0, 3.6363636363636362, 1.875, 2.875, 2.1666666666666665, 3.7777777777777777, 2.533333333333333, 2.933333333333333, 2.2666666666666666, 3.8333333333333335, 3.2, 2.5641025641025643, 2.5925925925925926, 3.4871794871794872, 2.090909090909091, 2.375, 2.0, 4.277777777777778, 3.021276595744681, 3.2413793103448274, 3.0, 2.3636363636363638, 5.172413793103448, 2.8, 1.9, 2.967741935483871, 3.0, 3.022222222222222, 3.515151515151515, 2.4375, 2.3846153846153846, 2.3225806451612905, 2.4745762711864407, 2.142857142857143, 2.5714285714285716, 2.111111111111111, 1.8461538461538463, 1.8333333333333333, 2.0, 2.235294117647059, 5.0625, 3.7857142857142856, 1.8666666666666667, 2.769230769230769, 4.888888888888889, 2.4444444444444446, 3.272727272727273, 3.255813953488372, 3.395348837209302], "numlists": [2.0, 3.0, 1.0, 9.0, 3.0, 2.0, 5.0, 6.0, 3.0, 8.0, 7.0, 7.0, 2.0, 6.0, 1.0, 8.0, 2.0, 8.0, 2.0, 7.0, 2.0, 10.0, 2.0, 6.0, 3.0, 5.0, 2.0, 6.0, 2.0, 9.0, 7.0, 6.0, 6.0, 1.0, 7.0, 4.0, 2.0, 6.0, 7.0, 5.0, 4.0, 4.0, 4.0, 4.0, 6.0, 1.0, 2.0, 2.0, 3.0, 1.0, 2.0, 6.0, 10.0, 8.0, 1.0, 4.0, 6.0, 2.0, 8.0, 7.0, 7.0], "persev_params": [0.0, 1.0, 0.02, 0.14, 0.03, 0.26, 0.84, 1.0, 0.05, 0.26, 0.31, 0.56, 0.16, 0.45, 0.0, 0.2, 0.16, 0.77, 0.15, 0.11, 0.09, 0.45, 1.0, 0.1, 0.16, 0.1, 0.0, 0.15, 0.0, 0.67, 0.24, 0.1, 0.12, 0.0, 1.0, 0.06, 0.0, 0.25, 0.26, 0.42, 0.86, 0.02, 0.06, 0.05, 0.02, 0.01, 0.36, 0.03, 0.0, 0.0, 0.08, 0.05, 0.25, 0.87, 0.01, 0.47, 0.94, 0.08, 0.33, 0.12, 0.29], "spl": [3.0, 2.241758241758242, 4.970588235294118, 4.169795918367347, 2.776666666666667, 2.590909090909091, 3.4926108374384235, 2.6233766233766236, 2.6363636363636362, 3.8487012987012985, 2.8004032258064515, 2.9833333333333334, 2.577777777777778, 2.3852813852813854, 5.666666666666667, 3.3891129032258065, 2.393939393939394, 2.6096866096866096, 2.8857142857142857, 5.444067796610169, 3.038095238095238, 2.846031746031746, 2.0952380952380953, 3.8110516934046346, 3.7834757834757835, 3.2550607287449393, 4.4978354978354975, 4.161290322580645, 3.358974358974359, 2.742857142857143, 3.2275670675300647, 2.8916256157635467, 2.4916666666666667, 3.4363636363636365, 2.1699507389162562, 2.9, 4.994736842105263, 2.9698924731182794, 2.8629032258064515, 5.268686868686869, 2.965909090909091, 3.8870967741935485, 3.7446153846153845, 4.232258064516129, 5.182933956750438, 4.274725274725275, 1.7142857142857142, 3.6013071895424837, 2.25, 4.333333333333333, 3.378787878787879, 5.374331550802139, 2.350806451612903, 2.4126984126984126, 4.380952380952381, 2.423076923076923, 2.133903133903134, 2.9411764705882355, 3.102272727272727, 3.0753045404208197, 3.1727574750830563], "smallworld": [0.5173721502874179, 1.5699013547107612, 0.0, 1.3432702597576216, 1.48859916013564, 0.0, 1.2171084144735351, 1.2113246551610766, 0.0, 1.6916676325440827, 1.3288272998080979, 1.0044905068146979, 0.8591193348846627, 0.30364756938745896, 0.0, 1.777077893621128, 0.0, 1.5434509727479337, 1.7933182278432351, 1.2961874563958067, 0.3203748233844747, 2.7981106806589486, 0.6829172461662436, 1.3397621145582306, 1.0345814804515354, 3.419618433957679, 0.6684012056690986, 0.8108098382675003, 0.0, 1.5672231200997584, 0.7425284926010829, 1.4241830599963174, 0.4389076546584051, 1.0868077022090097, 1.4501932892378002, 0.9913501632211905, 0.0, 0.9335010574681211, 0.8407130738252117, 0.8381975100477632, 1.2170683711117005, 1.1905810877033753, 0.22392285718358537, 0.6218488860299632, 0.26733804615213363, 1.2600603810726985, 0.6231886565049295, 0.0, 0.0, 0.0, 0.7957652187699428, 1.470148699807362, 1.59959061159865, 1.170021604276803, 0.0, 1.2509515456373042, 1.8804723774548826, 1.1844295968975709, 0.9986555608481857, 1.6007210453360878, 1.7504461872278037]}}
