# Supplementary material for: Analyzing Knowledge Retrieval Impairments Associated with Alzheimer’s Disease Using Network Analyses
Source: Hindawi journal article supplement (doi:10.1155/2019/4203158), 2019-01-01

Below are the correlations between factors listed in Table 2. Those boxes marked with an “X” are those that are not significant ( $p > .05$ ).

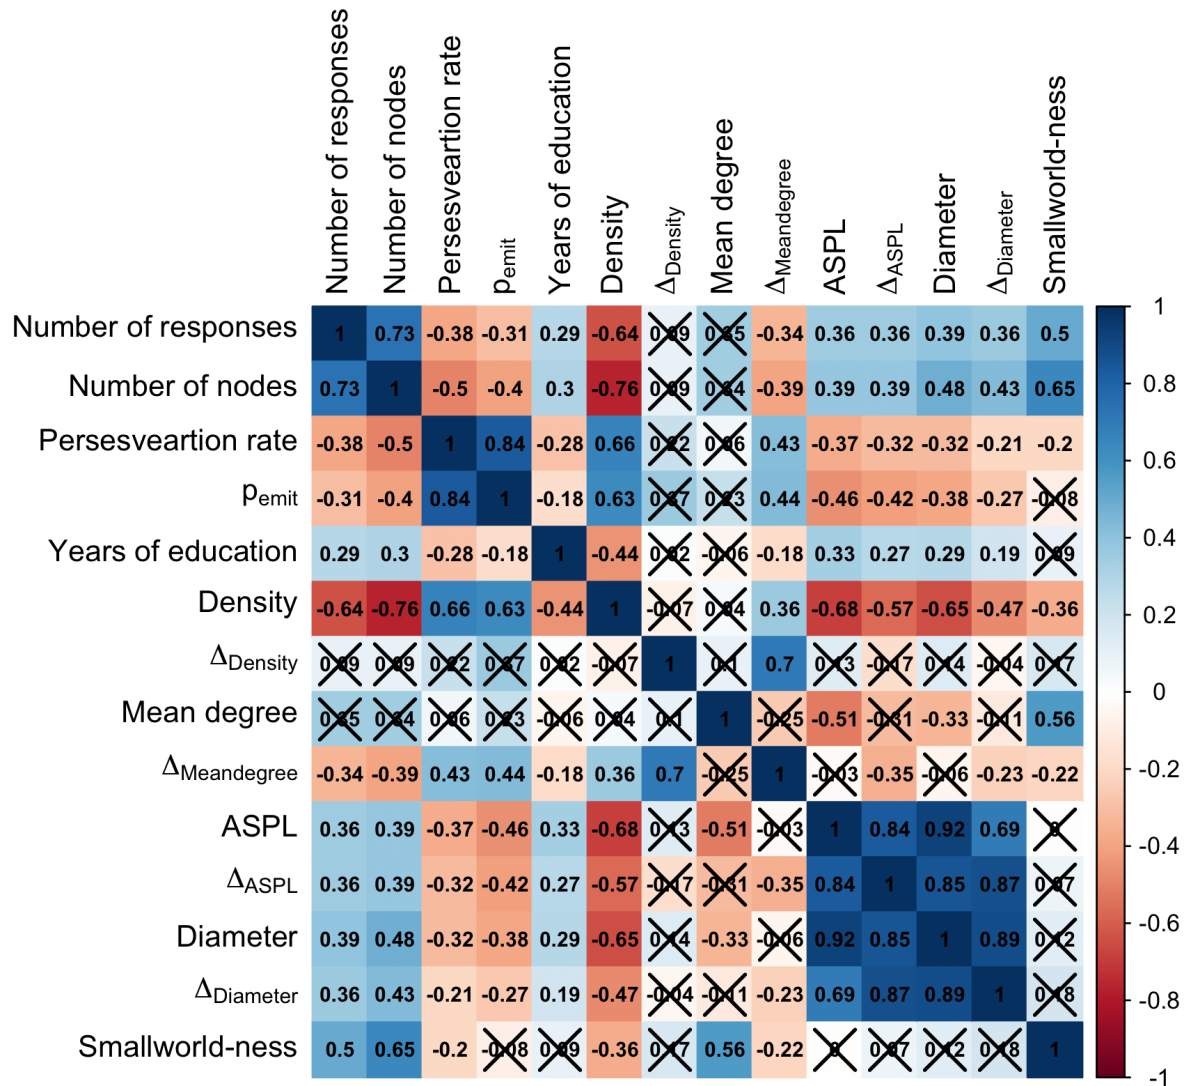

Supplement: f1 [file 4203158.f1.zip › correlation_matrix.pdf]
