# Supplementary material for: Analyzing Knowledge Retrieval Impairments Associated with Alzheimer’s Disease Using Network Analyses
Source: Hindawi journal article supplement (doi:10.1155/2019/4203158), 2019-01-01
Supplement: f1 [file 4203158.f1.zip › ucsd_fluency_for_snafu_20180518.csv]

id	listnum	group	SEX	EDUC	DRS	MMSE	category	rank	item
5	4	NC	2	16	144	30	animals	1	armadillo
5	4	NC	2	16	144	30	animals	2	horse
5	4	NC	2	16	144	30	animals	3	cow
5	4	NC	2	16	144	30	animals	4	goat
5	4	NC	2	16	144	30	animals	5	pig
5	4	NC	2	16	144	30	animals	6	rabbit
5	4	NC	2	16	144	30	animals	7	mice
5	4	NC	2	16	144	30	animals	8	rat
5	4	NC	2	16	144	30	animals	9	gnu
5	4	NC	2	16	144	30	animals	10	lion
5	4	NC	2	16	144	30	animals	11	leopard
5	4	NC	2	16	144	30	animals	12	elephant
5	4	NC	2	16	144	30	animals	13	giraffe
5	4	NC	2	16	144	30	animals	14	goat
5	4	NC	2	16	144	30	animals	15	sheep
5	4	NC	2	16	144	30	animals	16	sloth
5	4	NC	2	16	144	30	animals	17	monkey
5	4	NC	2	16	144	30	animals	18	boar
5	4	NC	2	16	144	30	animals	19	hyena
6	4	NC	1	19	144	30	animals	1	mice
6	4	NC	1	19	144	30	animals	2	rats
6	4	NC	1	19	144	30	animals	3	raccoon
6	4	NC	1	19	144	30	animals	4	dog
6	4	NC	1	19	144	30	animals	5	cat
6	4	NC	1	19	144	30	animals	6	elephant
6	4	NC	1	19	144	30	animals	7	cow
6	4	NC	1	19	144	30	animals	8	pig
6	4	NC	1	19	144	30	animals	9	chicken
6	4	NC	1	19	144	30	animals	10	goose
6	4	NC	1	19	144	30	animals	11	duck
6	4	NC	1	19	144	30	animals	12	bear
6	4	NC	1	19	144	30	animals	13	tiger
6	4	NC	1	19	144	30	animals	14	squirrel
6	4	NC	1	19	144	30	animals	15	lion
6	4	NC	1	19	144	30	animals	16	bird
6	4	NC	1	19	144	30	animals	17	deer
6	4	NC	1	19	144	30	animals	18	moose
6	4	NC	1	19	144	30	animals	19	elk
6	4	NC	1	19	144	30	animals	20	calf
6	4	NC	1	19	144	30	animals	21	woodchuck
6	4	NC	1	19	144	30	animals	22	ground squirrel
93	1	NC	2	14	143	30	animals	1	dog
93	1	NC	2	14	143	30	animals	2	cat
93	1	NC	2	14	143	30	animals	3	ape
93	1	NC	2	14	143	30	animals	4	elephant
93	1	NC	2	14	143	30	animals	5	monkey
93	1	NC	2	14	143	30	animals	6	chimpanzee
93	1	NC	2	14	143	30	animals	7	camel
93	1	NC	2	14	143	30	animals	8	zebra
93	1	NC	2	14	143	30	animals	9	bear
93	1	NC	2	14	143	30	animals	10	goat
93	1	NC	2	14	143	30	animals	11	sheep
93	1	NC	2	14	143	30	animals	12	rhino
93	1	NC	2	14	143	30	animals	13	buffalo
93	1	NC	2	14	143	30	animals	14	horse
93	1	NC	2	14	143	30	animals	15	moose
93	1	NC	2	14	143	30	animals	16	carabou
93	1	NC	2	14	143	30	animals	17	deer
93	1	NC	2	14	143	30	animals	18	kangaroo
93	1	NC	2	14	143	30	animals	19	giraffe
93	1	NC	2	14	143	30	animals	20	panda
93	2	NC	2	14	138	26	animals	1	owl
93	2	NC	2	14	138	26	animals	2	rhino
93	2	NC	2	14	138	26	animals	3	buffalo
93	2	NC	2	14	138	26	animals	4	horse
93	2	NC	2	14	138	26	animals	5	dog
93	2	NC	2	14	138	26	animals	6	cat
93	2	NC	2	14	138	26	animals	7	elephant
93	2	NC	2	14	138	26	animals	8	ostrich
93	2	NC	2	14	138	26	animals	9	monkey
93	2	NC	2	14	138	26	animals	10	zebra
93	2	NC	2	14	138	26	animals	11	bear
93	2	NC	2	14	138	26	animals	12	koala
93	2	NC	2	14	138	26	animals	13	muscrat
93	2	NC	2	14	138	26	animals	14	jackass
93	2	NC	2	14	138	26	animals	15	beaver
93	2	NC	2	14	138	26	animals	16	squirrel
93	2	NC	2	14	138	26	animals	17	rat
93	2	NC	2	14	138	26	animals	18	mice
93	2	NC	2	14	138	26	animals	19	pony
93	3	NC	2	14	143	30	animals	1	dog
93	3	NC	2	14	143	30	animals	2	rat
93	3	NC	2	14	143	30	animals	3	camel
93	3	NC	2	14	143	30	animals	4	horse
93	3	NC	2	14	143	30	animals	5	cat
93	3	NC	2	14	143	30	animals	6	ferret
93	3	NC	2	14	143	30	animals	7	hamster
93	3	NC	2	14	143	30	animals	8	tiger
93	3	NC	2	14	143	30	animals	9	elephant
93	3	NC	2	14	143	30	animals	10	lion
93	3	NC	2	14	143	30	animals	11	kangaroo
93	3	NC	2	14	143	30	animals	12	rhinocerous
93	3	NC	2	14	143	30	animals	13	deer
93	3	NC	2	14	143	30	animals	14	goat
93	3	NC	2	14	143	30	animals	15	koala
93	3	NC	2	14	143	30	animals	16	panda
93	3	NC	2	14	143	30	animals	17	bear
93	3	NC	2	14	143	30	animals	18	pig
93	3	NC	2	14	143	30	animals	19	chicken
93	4	NC	2	14	142	30	animals	1	dog
93	4	NC	2	14	142	30	animals	2	cat
93	4	NC	2	14	142	30	animals	3	rat
93	4	NC	2	14	142	30	animals	4	mouse
93	4	NC	2	14	142	30	animals	5	rhino
93	4	NC	2	14	142	30	animals	6	horse
93	4	NC	2	14	142	30	animals	7	unicorn
93	4	NC	2	14	142	30	animals	8	elephant
93	4	NC	2	14	142	30	animals	9	ape
93	4	NC	2	14	142	30	animals	10	beaver
93	4	NC	2	14	142	30	animals	11	camel
93	4	NC	2	14	142	30	animals	12	zebra
93	4	NC	2	14	142	30	animals	13	jackass
93	4	NC	2	14	142	30	animals	14	emu
93	4	NC	2	14	142	30	animals	15	fox
93	4	NC	2	14	142	30	animals	16	coyote
93	4	NC	2	14	142	30	animals	17	skunk
93	5	NC	2	14	142	30	animals	1	bear
93	5	NC	2	14	142	30	animals	2	tiger
93	5	NC	2	14	142	30	animals	3	elephant
93	5	NC	2	14	142	30	animals	4	cat
93	5	NC	2	14	142	30	animals	5	dog
93	5	NC	2	14	142	30	animals	6	antelope
93	5	NC	2	14	142	30	animals	7	deer
93	5	NC	2	14	142	30	animals	8	squirrel
93	5	NC	2	14	142	30	animals	9	mouse
93	5	NC	2	14	142	30	animals	10	rat
93	5	NC	2	14	142	30	animals	11	ferret
93	5	NC	2	14	142	30	animals	12	chimanzee
93	5	NC	2	14	142	30	animals	13	monkey
93	5	NC	2	14	142	30	animals	14	polar bear
93	5	NC	2	14	142	30	animals	15	elk
93	5	NC	2	14	142	30	animals	16	mouse
93	5	NC	2	14	142	30	animals	17	yak
93	5	NC	2	14	142	30	animals	18	horse
93	6	NC	2	14	143	30	animals	1	rhino
93	6	NC	2	14	143	30	animals	2	tiger
93	6	NC	2	14	143	30	animals	3	zebra
93	6	NC	2	14	143	30	animals	4	kangaroo
93	6	NC	2	14	143	30	animals	5	giraffe
93	6	NC	2	14	143	30	animals	6	elephant
93	6	NC	2	14	143	30	animals	7	ox
93	6	NC	2	14	143	30	animals	8	horse
93	6	NC	2	14	143	30	animals	9	dog
93	6	NC	2	14	143	30	animals	10	cat
93	6	NC	2	14	143	30	animals	11	skunk
93	6	NC	2	14	143	30	animals	12	rat
93	6	NC	2	14	143	30	animals	13	mouse
93	6	NC	2	14	143	30	animals	14	possum
93	6	NC	2	14	143	30	animals	15	raccoon
93	6	NC	2	14	143	30	animals	16	fox
93	6	NC	2	14	143	30	animals	17	coyote
93	6	NC	2	14	143	30	animals	18	monkey
93	6	NC	2	14	143	30	animals	19	baboon
93	7	NC	2	14	142	30	animals	1	rhino
93	7	NC	2	14	142	30	animals	2	beaver
93	7	NC	2	14	142	30	animals	3	dog
93	7	NC	2	14	142	30	animals	4	cat
93	7	NC	2	14	142	30	animals	5	horse
93	7	NC	2	14	142	30	animals	6	tiger
93	7	NC	2	14	142	30	animals	7	bear
93	7	NC	2	14	142	30	animals	8	chicken
93	7	NC	2	14	142	30	animals	9	goat
93	7	NC	2	14	142	30	animals	10	monkey
93	7	NC	2	14	142	30	animals	11	baboon
93	7	NC	2	14	142	30	animals	12	elephant
93	7	NC	2	14	142	30	animals	13	squirrel
93	7	NC	2	14	142	30	animals	14	fox
93	7	NC	2	14	142	30	animals	15	skunk
93	7	NC	2	14	142	30	animals	16	rat
93	8	NC	2	14	140	29	animals	2	cat
93	8	NC	2	14	140	29	animals	3	ferret
93	8	NC	2	14	140	29	animals	4	cow
93	8	NC	2	14	140	29	animals	5	skunk
93	8	NC	2	14	140	29	animals	6	raccoon
93	8	NC	2	14	140	29	animals	7	elephant
93	8	NC	2	14	140	29	animals	8	tiger
93	8	NC	2	14	140	29	animals	9	zebra
93	8	NC	2	14	140	29	animals	10	puma
93	8	NC	2	14	140	29	animals	11	lion
93	8	NC	2	14	140	29	animals	12	monkey
93	8	NC	2	14	140	29	animals	13	rhino
93	8	NC	2	14	140	29	animals	14	hippopotomus
93	8	NC	2	14	140	29	animals	15	pig
93	8	NC	2	14	140	29	animals	16	giraffe
93	8	NC	2	14	140	29	animals	17	koala
93	8	NC	2	14	140	29	animals	18	bear
93	9		2	14	139	30	animals	1	antelope
93	9		2	14	139	30	animals	2	bat
93	9		2	14	139	30	animals	3	bear
93	9		2	14	139	30	animals	4	cat
93	9		2	14	139	30	animals	5	crow
93	9		2	14	139	30	animals	6	dog
93	9		2	14	139	30	animals	7	frog
93	9		2	14	139	30	animals	8	cow
93	9		2	14	139	30	animals	9	horse
93	9		2	14	139	30	animals	10	tiger
93	9		2	14	139	30	animals	11	elephant
93	9		2	14	139	30	animals	12	rhino
93	9		2	14	139	30	animals	13	zebra
93	9		2	14	139	30	animals	14	tiger
93	9		2	14	139	30	animals	15	lion
93	9		2	14	139	30	animals	16	beaver
93	9		2	14	139	30	animals	17	skunk
93	10	NC	2	14	140	30	animals	1	dog
93	10	NC	2	14	140	30	animals	2	cat
93	10	NC	2	14	140	30	animals	3	horse
93	10	NC	2	14	140	30	animals	4	pig
93	10	NC	2	14	140	30	animals	5	elephant
93	10	NC	2	14	140	30	animals	6	rhino
93	10	NC	2	14	140	30	animals	7	tiger
93	10	NC	2	14	140	30	animals	8	lion
93	10	NC	2	14	140	30	animals	9	sheep
93	10	NC	2	14	140	30	animals	10	goat
93	10	NC	2	14	140	30	animals	11	donkey
93	10	NC	2	14	140	30	animals	12	kangaroo
93	10	NC	2	14	140	30	animals	13	elephant
93	10	NC	2	14	140	30	animals	14	deer
93	10	NC	2	14	140	30	animals	15	coyote
93	10	NC	2	14	140	30	animals	16	ferret
93	10	NC	2	14	140	30	animals	17	squirrel
93	11	NC	2	14	138	29	animals	1	orangutan
93	11	NC	2	14	138	29	animals	2	gorilla
93	11	NC	2	14	138	29	animals	3	monkey
93	11	NC	2	14	138	29	animals	4	cat
93	11	NC	2	14	138	29	animals	5	horse
93	11	NC	2	14	138	29	animals	6	dog
93	11	NC	2	14	138	29	animals	7	Rhinoceros
93	11	NC	2	14	138	29	animals	8	zebra
93	11	NC	2	14	138	29	animals	9	bear
93	11	NC	2	14	138	29	animals	10	cow
93	11	NC	2	14	138	29	animals	11	bull
93	11	NC	2	14	138	29	animals	12	buffalo
93	11	NC	2	14	138	29	animals	13	pig
93	11	NC	2	14	138	29	animals	14	goat
93	11	NC	2	14	138	29	animals	15	horse
93	11	NC	2	14	138	29	animals	16	cat
93	11	NC	2	14	138	29	animals	17	beaver
93	13	NC	2	14	142	30	animals	1	rat
93	13	NC	2	14	142	30	animals	2	cat
93	13	NC	2	14	142	30	animals	3	dog
93	13	NC	2	14	142	30	animals	4	donkey
93	13	NC	2	14	142	30	animals	5	unicorn
93	13	NC	2	14	142	30	animals	6	horse
93	13	NC	2	14	142	30	animals	7	cow
93	13	NC	2	14	142	30	animals	8	zebra
93	13	NC	2	14	142	30	animals	9	rhino
93	13	NC	2	14	142	30	animals	10	rabbit
93	13	NC	2	14	142	30	animals	11	bear
93	13	NC	2	14	142	30	animals	13	lion
93	13	NC	2	14	142	30	animals	14	tiger
93	13	NC	2	14	142	30	animals	15	chicken
93	13	NC	2	14	142	30	animals	16	turkey
93	13	NC	2	14	142	30	animals	17	elephant
93	13	NC	2	14	142	30	animals	18	fox
93	13	NC	2	14	142	30	animals	19	skunk
93	13	NC	2	14	142	30	animals	20	mouse
93	13	NC	2	14	142	30	animals	21	snake
603	1	NC	2	12	143	30	animals	1	dog
603	1	NC	2	12	143	30	animals	2	cat
603	1	NC	2	12	143	30	animals	3	raccoon
603	1	NC	2	12	143	30	animals	4	squirrel
603	1	NC	2	12	143	30	animals	5	rat
603	1	NC	2	12	143	30	animals	6	cow
603	1	NC	2	12	143	30	animals	7	horse
603	1	NC	2	12	143	30	animals	8	pig
603	1	NC	2	12	143	30	animals	9	anteater
603	1	NC	2	12	143	30	animals	10	lion
603	1	NC	2	12	143	30	animals	11	tiger
603	1	NC	2	12	143	30	animals	12	leopard
603	1	NC	2	12	143	30	animals	13	giraffe
603	1	NC	2	12	143	30	animals	14	elephant
603	1	NC	2	12	143	30	animals	15	rhino
603	1	NC	2	12	143	30	animals	16	hippo
603	1	NC	2	12	143	30	animals	17	alligator
603	1	NC	2	12	143	30	animals	18	koala
603	2	NC	2	12	143	29	animals	1	dog
603	2	NC	2	12	143	29	animals	2	cat
603	2	NC	2	12	143	29	animals	3	rat
603	2	NC	2	12	143	29	animals	4	mouse
603	2	NC	2	12	143	29	animals	5	hippo
603	2	NC	2	12	143	29	animals	6	rhino
603	2	NC	2	12	143	29	animals	7	alligator
603	2	NC	2	12	143	29	animals	8	moose
603	2	NC	2	12	143	29	animals	9	bear
603	2	NC	2	12	143	29	animals	10	elephant
603	2	NC	2	12	143	29	animals	11	crocodile
603	2	NC	2	12	143	29	animals	12	snake
603	2	NC	2	12	143	29	animals	13	lizard
603	2	NC	2	12	143	29	animals	14	beaver
603	2	NC	2	12	143	29	animals	15	groundhog
603	2	NC	2	12	143	29	animals	16	fox
603	2	NC	2	12	143	29	animals	17	coyote
603	2	NC	2	12	143	29	animals	18	lamb
603	2	NC	2	12	143	29	animals	19	rabbit
603	2	NC	2	12	143	29	animals	20	cow
603	2	NC	2	12	143	29	animals	21	horse
603	2	NC	2	12	143	29	animals	22	pig
603	2	NC	2	12	143	29	animals	23	goat
603	2	NC	2	12	143	29	animals	24	donkeys
603	2	NC	2	12	143	29	animals	25	mule
603	2	NC	2	12	143	29	animals	26	llama
603	3	NC	2	12	142	29	animals	1	dog
603	3	NC	2	12	142	29	animals	2	cat
603	3	NC	2	12	142	29	animals	3	lion
603	3	NC	2	12	142	29	animals	4	tiger
603	3	NC	2	12	142	29	animals	5	leopard
603	3	NC	2	12	142	29	animals	6	rat
603	3	NC	2	12	142	29	animals	7	mouse
603	3	NC	2	12	142	29	animals	8	elephant
603	3	NC	2	12	142	29	animals	9	horse
603	3	NC	2	12	142	29	animals	10	horse
603	3	NC	2	12	142	29	animals	11	cow
603	3	NC	2	12	142	29	animals	12	sheep
603	3	NC	2	12	142	29	animals	13	hog
603	3	NC	2	12	142	29	animals	14	alligator
603	3	NC	2	12	142	29	animals	15	crocodile
603	3	NC	2	12	142	29	animals	16	whale
603	3	NC	2	12	142	29	animals	17	man
603	3	NC	2	12	142	29	animals	18	mountain lion
603	3	NC	2	12	142	29	animals	19	cougar
603	3	NC	2	12	142	29	animals	20	coyote
603	4	NC	2	12	144	30	animals	1	anteater
603	4	NC	2	12	144	30	animals	2	bear
603	4	NC	2	12	144	30	animals	3	cat
603	4	NC	2	12	144	30	animals	4	lion
603	4	NC	2	12	144	30	animals	5	dog
603	4	NC	2	12	144	30	animals	6	snake
603	4	NC	2	12	144	30	animals	7	elephant
603	4	NC	2	12	144	30	animals	8	giraffe
603	4	NC	2	12	144	30	animals	9	rhino
603	4	NC	2	12	144	30	animals	10	hippo
603	4	NC	2	12	144	30	animals	11	monkey
603	4	NC	2	12	144	30	animals	12	gorillas
603	4	NC	2	12	144	30	animals	13	camel
603	4	NC	2	12	144	30	animals	14	zebra
603	4	NC	2	12	144	30	animals	15	horse
603	4	NC	2	12	144	30	animals	16	pig
603	4	NC	2	12	144	30	animals	17	sheep
603	5	NC	2	12	142	28	animals	1	cow
603	5	NC	2	12	142	28	animals	2	horse
603	5	NC	2	12	142	28	animals	3	pig
603	5	NC	2	12	142	28	animals	4	ox
603	5	NC	2	12	142	28	animals	5	wolf
603	5	NC	2	12	142	28	animals	6	weasel
603	5	NC	2	12	142	28	animals	7	lynx
603	5	NC	2	12	142	28	animals	8	lion
603	5	NC	2	12	142	28	animals	9	tiger
603	5	NC	2	12	142	28	animals	10	bear
603	5	NC	2	12	142	28	animals	11	giraffe
603	5	NC	2	12	142	28	animals	12	elephant
603	5	NC	2	12	142	28	animals	13	mouse
603	5	NC	2	12	142	28	animals	14	rat
603	5	NC	2	12	142	28	animals	15	man
603	5	NC	2	12	142	28	animals	16	lamb
603	5	NC	2	12	142	28	animals	17	sheep
603	6	NC	2	12	141	30	animals	1	cat
603	6	NC	2	12	141	30	animals	2	dog
603	6	NC	2	12	141	30	animals	3	rhino
603	6	NC	2	12	141	30	animals	4	hippo
603	6	NC	2	12	141	30	animals	5	bear
603	6	NC	2	12	141	30	animals	6	panther
603	6	NC	2	12	141	30	animals	7	lion
603	6	NC	2	12	141	30	animals	8	camel
603	6	NC	2	12	141	30	animals	9	elephant
603	6	NC	2	12	141	30	animals	10	raccoon
603	6	NC	2	12	141	30	animals	11	beaver
603	6	NC	2	12	141	30	animals	12	otter
603	6	NC	2	12	141	30	animals	13	skunk
603	6	NC	2	12	141	30	animals	14	horse
603	6	NC	2	12	141	30	animals	15	cow
603	6	NC	2	12	141	30	animals	16	pig
603	6	NC	2	12	141	30	animals	17	sheep
603	6	NC	2	12	141	30	animals	18	goat
603	6	NC	2	12	141	30	animals	19	mountain lion
603	6	NC	2	12	141	30	animals	20	tiger
603	6	NC	2	12	141	30	animals	21	emu
603	7	NC	2	12	142	29	animals	1	dog
603	7	NC	2	12	142	29	animals	2	cat
603	7	NC	2	12	142	29	animals	3	cow
603	7	NC	2	12	142	29	animals	4	horse
603	7	NC	2	12	142	29	animals	5	pig
603	7	NC	2	12	142	29	animals	6	elephant
603	7	NC	2	12	142	29	animals	7	giraffe
603	7	NC	2	12	142	29	animals	8	bear
603	7	NC	2	12	142	29	animals	9	lion
603	7	NC	2	12	142	29	animals	10	moose
603	7	NC	2	12	142	29	animals	11	elk
603	7	NC	2	12	142	29	animals	12	deer
603	7	NC	2	12	142	29	animals	13	skunk
603	7	NC	2	12	142	29	animals	14	possum
603	7	NC	2	12	142	29	animals	15	tiger
603	7	NC	2	12	142	29	animals	16	leopard
603	7	NC	2	12	142	29	animals	17	kangaroo
603	7	NC	2	12	142	29	animals	18	rhino
610	1	NC	1	12	136	28	animals	1	cat
610	1	NC	1	12	136	28	animals	2	dog
610	1	NC	1	12	136	28	animals	3	badger
610	1	NC	1	12	136	28	animals	4	possum
610	1	NC	1	12	136	28	animals	5	mouse
610	1	NC	1	12	136	28	animals	6	deer
610	1	NC	1	12	136	28	animals	7	elk
610	1	NC	1	12	136	28	animals	8	buffalo
610	1	NC	1	12	136	28	animals	9	lion
610	1	NC	1	12	136	28	animals	10	water buffalo
610	1	NC	1	12	136	28	animals	11	monkey
610	1	NC	1	12	136	28	animals	12	ape
610	1	NC	1	12	136	28	animals	13	human
610	1	NC	1	12	136	28	animals	14	chimp
610	1	NC	1	12	136	28	animals	16	caterpillar
610	1	NC	1	12	136	28	animals	18	kangaroo
610	1	NC	1	12	136	28	animals	19	mustang
610	1	NC	1	12	136	28	animals	20	cow
610	2	NC	1	12	136	29	animals	1	cow
610	2	NC	1	12	136	29	animals	2	horse
610	2	NC	1	12	136	29	animals	3	calf
610	2	NC	1	12	136	29	animals	4	donkeys
610	2	NC	1	12	136	29	animals	5	mule
610	2	NC	1	12	136	29	animals	6	ferret
610	2	NC	1	12	136	29	animals	7	dog
610	2	NC	1	12	136	29	animals	8	cat
610	2	NC	1	12	136	29	animals	9	orangutang
610	2	NC	1	12	136	29	animals	10	elephant
610	2	NC	1	12	136	29	animals	11	camel
610	2	NC	1	12	136	29	animals	12	jaguar
610	2	NC	1	12	136	29	animals	13	lion
610	2	NC	1	12	136	29	animals	14	mule
610	2	NC	1	12	136	29	animals	15	donkeys
610	3	NC	1	12	140	30	animals	1	cat
610	3	NC	1	12	140	30	animals	2	dog
610	3	NC	1	12	140	30	animals	3	fish
610	3	NC	1	12	140	30	animals	4	dolphin
610	3	NC	1	12	140	30	animals	5	elephant
610	3	NC	1	12	140	30	animals	6	zebra
610	3	NC	1	12	140	30	animals	7	lion
610	3	NC	1	12	140	30	animals	8	leopard
610	3	NC	1	12	140	30	animals	9	cheetah
610	3	NC	1	12	140	30	animals	10	parrot
610	3	NC	1	12	140	30	animals	11	flamingo
610	3	NC	1	12	140	30	animals	12	hawk
610	3	NC	1	12	140	30	animals	13	sparrow
610	3	NC	1	12	140	30	animals	14	robin
610	3	NC	1	12	140	30	animals	15	wren
610	3	NC	1	12	140	30	animals	16	donkeys
610	3	NC	1	12	140	30	animals	17	badger
610	4	NC	1	12	143	-4	animals	1	anteater
610	4	NC	1	12	143	-4	animals	2	Aardvark
610	4	NC	1	12	143	-4	animals	3	possum
610	4	NC	1	12	143	-4	animals	4	deer
610	4	NC	1	12	143	-4	animals	5	tiger
610	4	NC	1	12	143	-4	animals	6	leopard
610	4	NC	1	12	143	-4	animals	7	jaguar
610	4	NC	1	12	143	-4	animals	8	cat
610	4	NC	1	12	143	-4	animals	9	dog
610	4	NC	1	12	143	-4	animals	10	wolf
610	4	NC	1	12	143	-4	animals	11	fosx
610	4	NC	1	12	143	-4	animals	12	elephant
610	4	NC	1	12	143	-4	animals	13	hippo
610	4	NC	1	12	143	-4	animals	14	horse
610	4	NC	1	12	143	-4	animals	15	mule
610	4	NC	1	12	143	-4	animals	16	beaver
610	4	NC	1	12	143	-4	animals	17	weasel
610	4	NC	1	12	143	-4	animals	18	mongoose
610	5	NC	1	12	138	30	animals	1	beaver
610	5	NC	1	12	138	30	animals	2	dog
610	5	NC	1	12	138	30	animals	3	cat
610	5	NC	1	12	138	30	animals	4	camel
610	5	NC	1	12	138	30	animals	5	Aardvark
610	5	NC	1	12	138	30	animals	6	horse
610	5	NC	1	12	138	30	animals	7	mule
610	5	NC	1	12	138	30	animals	8	donkeys
610	5	NC	1	12	138	30	animals	9	cow
610	5	NC	1	12	138	30	animals	10	calf
610	5	NC	1	12	138	30	animals	11	bull
610	5	NC	1	12	138	30	animals	12	leopard
610	5	NC	1	12	138	30	animals	13	cheeta
610	5	NC	1	12	138	30	animals	14	tiger
610	5	NC	1	12	138	30	animals	15	elephant
610	5	NC	1	12	138	30	animals	16	giraffe
610	5	NC	1	12	138	30	animals	17	snake
610	5	NC	1	12	138	30	animals	18	buffalo
610	6	NC	1	12	143	30	animals	1	cow
610	6	NC	1	12	143	30	animals	2	horse
610	6	NC	1	12	143	30	animals	3	calf
610	6	NC	1	12	143	30	animals	4	dog
610	6	NC	1	12	143	30	animals	5	cat
610	6	NC	1	12	143	30	animals	6	donkeys
610	6	NC	1	12	143	30	animals	7	zebra
610	6	NC	1	12	143	30	animals	8	lion
610	6	NC	1	12	143	30	animals	9	leopard
610	6	NC	1	12	143	30	animals	10	meer cat
610	6	NC	1	12	143	30	animals	11	snake
610	6	NC	1	12	143	30	animals	12	monkey
610	6	NC	1	12	143	30	animals	13	giraffe
610	6	NC	1	12	143	30	animals	14	elephant
610	6	NC	1	12	143	30	animals	15	hippo
610	6	NC	1	12	143	30	animals	16	rhino
610	6	NC	1	12	143	30	animals	17	birds
610	6	NC	1	12	143	30	animals	18	antelope
610	6	NC	1	12	143	30	animals	19	badger
610	6	NC	1	12	143	30	animals	20	skunk
610	7	NC	1	12	136	30	animals	1	Aardvark
610	7	NC	1	12	136	30	animals	2	anteater
610	7	NC	1	12	136	30	animals	3	babboon
610	7	NC	1	12	136	30	animals	4	bull
610	7	NC	1	12	136	30	animals	5	cow
610	7	NC	1	12	136	30	animals	6	giraffe
610	7	NC	1	12	136	30	animals	7	elephant
610	7	NC	1	12	136	30	animals	8	cat
610	7	NC	1	12	136	30	animals	9	dog
610	7	NC	1	12	136	30	animals	10	mouse
610	8	NC	1	12	141	30	animals	1	sheep
610	8	NC	1	12	141	30	animals	2	lamb
610	8	NC	1	12	141	30	animals	3	ewe
610	8	NC	1	12	141	30	animals	4	calf
610	8	NC	1	12	141	30	animals	5	cow
610	8	NC	1	12	141	30	animals	6	horse
610	8	NC	1	12	141	30	animals	7	dog
610	8	NC	1	12	141	30	animals	8	cat
610	8	NC	1	12	141	30	animals	9	hippopotamus
610	8	NC	1	12	141	30	animals	10	rhinoceros
610	8	NC	1	12	141	30	animals	11	giraffe
610	8	NC	1	12	141	30	animals	12	elephant
610	8	NC	1	12	141	30	animals	13	lion
610	8	NC	1	12	141	30	animals	14	leopard
610	8	NC	1	12	141	30	animals	15	badger
610	8	NC	1	12	141	30	animals	16	beaver
610	8	NC	1	12	141	30	animals	17	zebra
610	8	NC	1	12	141	30	animals	18	anteater
610	9	NC	1	12	130	30	animals	1	calves
610	9	NC	1	12	130	30	animals	2	cow
610	9	NC	1	12	130	30	animals	3	bull
610	9	NC	1	12	130	30	animals	4	horse
610	9	NC	1	12	130	30	animals	5	jackass
610	9	NC	1	12	130	30	animals	6	cat
610	9	NC	1	12	130	30	animals	7	dog
610	9	NC	1	12	130	30	animals	8	elephant
610	9	NC	1	12	130	30	animals	9	zebra
610	9	NC	1	12	130	30	animals	10	raccoon
610	9	NC	1	12	130	30	animals	11	badger
610	9	NC	1	12	130	30	animals	12	beaver
610	9	NC	1	12	130	30	animals	13	rhinoceros
610	9	NC	1	12	130	30	animals	14	horse
610	9	NC	1	12	130	30	animals	15	anteater
610	9	NC	1	12	130	30	animals	16	camel
610	9	NC	1	12	130	30	animals	17	sheep
610	10	NC	1	12	141	30	animals	1	Aardvark
610	10	NC	1	12	141	30	animals	2	ant
610	10	NC	1	12	141	30	animals	3	anteater
610	10	NC	1	12	141	30	animals	4	elephant
610	10	NC	1	12	141	30	animals	5	lion
610	10	NC	1	12	141	30	animals	6	tiger
610	10	NC	1	12	141	30	animals	7	leopard
610	10	NC	1	12	141	30	animals	8	cat
610	10	NC	1	12	141	30	animals	9	dog
610	10	NC	1	12	141	30	animals	10	cow
610	10	NC	1	12	141	30	animals	11	bull
610	10	NC	1	12	141	30	animals	12	goat
610	10	NC	1	12	141	30	animals	13	giraffe
610	11	NC	1	12	138	30	animals	1	beaver
610	11	NC	1	12	138	30	animals	2	bobcat
610	11	NC	1	12	138	30	animals	3	horse
610	11	NC	1	12	138	30	animals	4	mule
610	11	NC	1	12	138	30	animals	5	cow
610	11	NC	1	12	138	30	animals	6	calf
610	11	NC	1	12	138	30	animals	7	bull
610	11	NC	1	12	138	30	animals	8	dog
610	11	NC	1	12	138	30	animals	9	lynx
610	11	NC	1	12	138	30	animals	10	lion
610	12	NC	1	12	133	29	animals	1	Aardvark
610	12	NC	1	12	133	29	animals	2	anteater
610	12	NC	1	12	133	29	animals	3	horse
610	12	NC	1	12	133	29	animals	4	dog
610	12	NC	1	12	133	29	animals	5	cat
610	12	NC	1	12	133	29	animals	6	mule
610	12	NC	1	12	133	29	animals	7	elephant
610	12	NC	1	12	133	29	animals	8	tiger
610	12	NC	1	12	133	29	animals	9	leopard
610	12	NC	1	12	133	29	animals	10	bass
610	12	NC	1	12	133	29	animals	11	pickerel
610	12	NC	1	12	133	29	animals	12	squid
610	12	NC	1	12	133	29	animals	13	crawpies
610	12	NC	1	12	133	29	animals	14	cow
610	13	NC	1	12	129	28	animals	1	Aardvark
610	13	NC	1	12	129	28	animals	2	cat
610	13	NC	1	12	129	28	animals	3	dog
610	13	NC	1	12	129	28	animals	4	alligator
610	13	NC	1	12	129	28	animals	5	crocodile
610	13	NC	1	12	129	28	animals	6	cow
610	13	NC	1	12	129	28	animals	7	moose
610	13	NC	1	12	129	28	animals	8	deer
610	14	NC	1	12	135	30	animals	1	dolphins
610	14	NC	1	12	135	30	animals	2	tiger
610	14	NC	1	12	135	30	animals	3	lamb
610	14	NC	1	12	135	30	animals	4	lion
610	14	NC	1	12	135	30	animals	5	horse
610	14	NC	1	12	135	30	animals	6	cow
610	14	NC	1	12	135	30	animals	7	calves
610	14	NC	1	12	135	30	animals	8	snakes
610	14	NC	1	12	135	30	animals	9	alligator
610	14	NC	1	12	135	30	animals	10	crocodile
610	14	NC	1	12	135	30	animals	11	giraffe
610	15	NC	1	12	133	26	animals	1	cow
610	15	NC	1	12	133	26	animals	2	calves
610	15	NC	1	12	133	26	animals	3	sheep
610	15	NC	1	12	133	26	animals	4	goat
610	15	NC	1	12	133	26	animals	5	dog
610	15	NC	1	12	133	26	animals	6	cat
610	15	NC	1	12	133	26	animals	7	elephant
610	15	NC	1	12	133	26	animals	8	lion
610	15	NC	1	12	133	26	animals	9	tiger
610	15	NC	1	12	133	26	animals	10	snake
610	15	NC	1	12	133	26	animals	11	giraffe
610	15	NC	1	12	133	26	animals	12	kangaroo
617	1	NC	1	16	140	30	animals	1	Aardvark
617	1	NC	1	16	140	30	animals	2	bull
617	1	NC	1	16	140	30	animals	3	skunk
617	1	NC	1	16	140	30	animals	4	cow
617	1	NC	1	16	140	30	animals	5	horse
617	1	NC	1	16	140	30	animals	6	giraffe
617	1	NC	1	16	140	30	animals	7	dog
617	1	NC	1	16	140	30	animals	8	cat
617	1	NC	1	16	140	30	animals	9	rabbit
617	1	NC	1	16	140	30	animals	10	mouse
617	1	NC	1	16	140	30	animals	11	giraffe
617	1	NC	1	16	140	30	animals	12	elephant
617	1	NC	1	16	140	30	animals	13	possum
617	1	NC	1	16	140	30	animals	14	porcupine
617	1	NC	1	16	140	30	animals	15	zebra
617	1	NC	1	16	140	30	animals	16	llama
617	1	NC	1	16	140	30	animals	17	orapi
617	2	NC	1	16	133	28	animals	1	cat
617	2	NC	1	16	133	28	animals	2	dog
617	2	NC	1	16	133	28	animals	3	horse
617	2	NC	1	16	133	28	animals	4	cow
617	2	NC	1	16	133	28	animals	5	llama
617	2	NC	1	16	133	28	animals	6	zebra
617	2	NC	1	16	133	28	animals	7	giraffe
617	2	NC	1	16	133	28	animals	8	elephant
617	2	NC	1	16	133	28	animals	9	tiger
617	2	NC	1	16	133	28	animals	10	lion
617	2	NC	1	16	133	28	animals	11	wolf
617	2	NC	1	16	133	28	animals	12	lynx
617	2	NC	1	16	133	28	animals	13	chimpanzee
617	2	NC	1	16	133	28	animals	14	chipmunk
617	2	NC	1	16	133	28	animals	15	squirrel
617	2	NC	1	16	133	28	animals	16	beaver
617	2	NC	1	16	133	28	animals	17	woodchuck
617	2	NC	1	16	133	28	animals	18	mole
617	2	NC	1	16	133	28	animals	19	gopher
617	2	NC	1	16	133	28	animals	20	mouse
617	2	NC	1	16	133	28	animals	21	rat
617	2	NC	1	16	133	28	animals	22	lynx
617	2	NC	1	16	133	28	animals	23	hyena
617	3	NC	1	16	138	30	animals	1	cat
617	3	NC	1	16	138	30	animals	2	dog
617	3	NC	1	16	138	30	animals	3	rabbit
617	3	NC	1	16	138	30	animals	4	rat
617	3	NC	1	16	138	30	animals	5	raccoon
617	3	NC	1	16	138	30	animals	6	kangaroo
617	3	NC	1	16	138	30	animals	7	horse
617	3	NC	1	16	138	30	animals	8	cow
617	3	NC	1	16	138	30	animals	9	tiger
617	3	NC	1	16	138	30	animals	10	giraffe
617	3	NC	1	16	138	30	animals	11	obopi
617	3	NC	1	16	138	30	animals	12	weasel
617	3	NC	1	16	138	30	animals	13	ferret
617	3	NC	1	16	138	30	animals	14	shark
617	3	NC	1	16	138	30	animals	15	possum
617	3	NC	1	16	138	30	animals	16	squirrel
617	3	NC	1	16	138	30	animals	17	mole
617	3	NC	1	16	138	30	animals	18	woodchuck
617	4	NC	1	16	139	29	animals	1	cat
617	4	NC	1	16	139	29	animals	2	buffalo
617	4	NC	1	16	139	29	animals	3	bison
617	4	NC	1	16	139	29	animals	4	dog
617	4	NC	1	16	139	29	animals	5	ferret
617	4	NC	1	16	139	29	animals	6	gorilla
617	4	NC	1	16	139	29	animals	7	cow
617	4	NC	1	16	139	29	animals	8	ox
617	4	NC	1	16	139	29	animals	9	horse
617	4	NC	1	16	139	29	animals	10	zebra
617	4	NC	1	16	139	29	animals	11	possum
617	4	NC	1	16	139	29	animals	12	skunk
617	4	NC	1	16	139	29	animals	13	rat
617	4	NC	1	16	139	29	animals	14	mouse
617	4	NC	1	16	139	29	animals	15	chimp
617	4	NC	1	16	139	29	animals	16	kangaroo
617	4	NC	1	16	139	29	animals	17	mole
617	5	NC	1	16	140	29	animals	1	zebra
617	5	NC	1	16	140	29	animals	2	horse
617	5	NC	1	16	140	29	animals	3	lamb
617	5	NC	1	16	140	29	animals	4	cow
617	5	NC	1	16	140	29	animals	5	steer
617	5	NC	1	16	140	29	animals	6	chipmunk
617	5	NC	1	16	140	29	animals	7	squirrel
617	5	NC	1	16	140	29	animals	8	rabbit
617	5	NC	1	16	140	29	animals	9	cat
617	5	NC	1	16	140	29	animals	10	dog
617	5	NC	1	16	140	29	animals	11	weasel
617	5	NC	1	16	140	29	animals	12	monkey
617	5	NC	1	16	140	29	animals	13	giraffe
617	5	NC	1	16	140	29	animals	14	lion
617	6	NC	1	16	135	27	animals	1	bird
617	6	NC	1	16	135	27	animals	2	cat
617	6	NC	1	16	135	27	animals	3	dog
617	6	NC	1	16	135	27	animals	4	horse
617	6	NC	1	16	135	27	animals	5	cow
617	6	NC	1	16	135	27	animals	6	zebra
617	6	NC	1	16	135	27	animals	7	elephant
617	6	NC	1	16	135	27	animals	8	camel
617	6	NC	1	16	135	27	animals	9	dramadary
617	6	NC	1	16	135	27	animals	10	minx
617	6	NC	1	16	135	27	animals	11	lynx
617	6	NC	1	16	135	27	animals	12	weasel
617	6	NC	1	16	135	27	animals	13	otter
617	7	NC	1	16	138	28	animals	1	horse
617	7	NC	1	16	138	28	animals	2	donkey
617	7	NC	1	16	138	28	animals	3	boar
617	7	NC	1	16	138	28	animals	4	cat
617	7	NC	1	16	138	28	animals	5	cougar
617	7	NC	1	16	138	28	animals	6	cheeta
617	7	NC	1	16	138	28	animals	7	dog
617	7	NC	1	16	138	28	animals	8	wolf
617	7	NC	1	16	138	28	animals	9	rabbit
617	7	NC	1	16	138	28	animals	10	mouse
617	7	NC	1	16	138	28	animals	11	rat
617	7	NC	1	16	138	28	animals	12	mole
617	7	NC	1	16	138	28	animals	13	weasel
617	7	NC	1	16	138	28	animals	14	giraffe
617	7	NC	1	16	138	28	animals	15	beaver
617	7	NC	1	16	138	28	animals	16	armadillo
617	8	NC	1	16	140	20	animals	1	cat
617	8	NC	1	16	140	20	animals	2	dog
617	8	NC	1	16	140	20	animals	3	mouse
617	8	NC	1	16	140	20	animals	4	rat
617	8	NC	1	16	140	20	animals	5	beaver
617	8	NC	1	16	140	20	animals	6	linx
617	8	NC	1	16	140	20	animals	7	mink
617	8	NC	1	16	140	20	animals	8	horse
617	8	NC	1	16	140	20	animals	9	cow
617	8	NC	1	16	140	20	animals	10	zebra
617	8	NC	1	16	140	20	animals	11	elephant
617	8	NC	1	16	140	20	animals	12	camel
617	8	NC	1	16	140	20	animals	13	wildcat
617	8	NC	1	16	140	20	animals	14	donkey
617	8	NC	1	16	140	20	animals	15	otter
617	8	NC	1	16	140	20	animals	16	weasel
617	9	NC	1	16	138	30	animals	1	cat
617	9	NC	1	16	138	30	animals	2	camel
617	9	NC	1	16	138	30	animals	3	dog
617	9	NC	1	16	138	30	animals	4	horse
617	9	NC	1	16	138	30	animals	5	cow
617	9	NC	1	16	138	30	animals	6	rabbit
617	9	NC	1	16	138	30	animals	7	rat
617	9	NC	1	16	138	30	animals	8	mouse
617	9	NC	1	16	138	30	animals	9	beaver
617	9	NC	1	16	138	30	animals	10	platypus
617	9	NC	1	16	138	30	animals	11	llama
617	10	NC	1	16	131	29	animals	1	bear
617	10	NC	1	16	131	29	animals	2	boar
617	10	NC	1	16	131	29	animals	3	pig
617	10	NC	1	16	131	29	animals	4	horse
617	10	NC	1	16	131	29	animals	5	stallion
617	10	NC	1	16	131	29	animals	6	mare
617	10	NC	1	16	131	29	animals	7	filly
617	10	NC	1	16	131	29	animals	8	calf
617	10	NC	1	16	131	29	animals	9	beaver
617	10	NC	1	16	131	29	animals	10	deer
617	10	NC	1	16	131	29	animals	11	doe
617	10	NC	1	16	131	29	animals	12	buck
617	10	NC	1	16	131	29	animals	13	cat
617	10	NC	1	16	131	29	animals	14	dog
617	10	NC	1	16	131	29	animals	15	cow
617	10	NC	1	16	131	29	animals	16	elk
617	10	NC	1	16	131	29	animals	17	sheep
617	10	NC	1	16	131	29	animals	18	goat
617	10	NC	1	16	131	29	animals	19	fox
617	10	NC	1	16	131	29	animals	20	jackal
617	10	NC	1	16	131	29	animals	21	camel
617	11	NC	1	16	139	27	animals	1	cow
617	11	NC	1	16	139	27	animals	2	sheep
617	11	NC	1	16	139	27	animals	3	dog
617	11	NC	1	16	139	27	animals	4	rabbit
617	11	NC	1	16	139	27	animals	5	raccoon
617	11	NC	1	16	139	27	animals	6	skunk
617	11	NC	1	16	139	27	animals	7	possum
617	11	NC	1	16	139	27	animals	8	horse
617	11	NC	1	16	139	27	animals	9	monkey
617	11	NC	1	16	139	27	animals	10	babboon
617	11	NC	1	16	139	27	animals	11	ape
617	11	NC	1	16	139	27	animals	12	gorilla
617	11	NC	1	16	139	27	animals	13	eagel
617	11	NC	1	16	139	27	animals	14	canary
617	11	NC	1	16	139	27	animals	15	black bird
617	11	NC	1	16	139	27	animals	16	humming bird
617	11	NC	1	16	139	27	animals	17	oriole
617	11	NC	1	16	139	27	animals	18	hawk
617	11	NC	1	16	139	27	animals	19	vulture
617	12	NC	1	16	139	28	animals	1	cat
617	12	NC	1	16	139	28	animals	2	dog
617	12	NC	1	16	139	28	animals	3	mouse
617	12	NC	1	16	139	28	animals	4	rat
617	12	NC	1	16	139	28	animals	5	weasel
617	12	NC	1	16	139	28	animals	6	beaver
617	12	NC	1	16	139	28	animals	7	buffalo
617	12	NC	1	16	139	28	animals	8	bison
617	12	NC	1	16	139	28	animals	9	zebra
617	12	NC	1	16	139	28	animals	10	elephant
617	12	NC	1	16	139	28	animals	11	tiger
617	12	NC	1	16	139	28	animals	12	lion
617	12	NC	1	16	139	28	animals	13	leopard
617	12	NC	1	16	139	28	animals	14	lynx
617	12	NC	1	16	139	28	animals	15	horse
617	12	NC	1	16	139	28	animals	16	donkey
617	12	NC	1	16	139	28	animals	17	puma
617	13	NC	1	16	139	27	animals	1	cow
617	13	NC	1	16	139	27	animals	2	horse
617	13	NC	1	16	139	27	animals	3	sheep
617	13	NC	1	16	139	27	animals	4	pig
617	13	NC	1	16	139	27	animals	5	donkey
617	13	NC	1	16	139	27	animals	6	lion
617	13	NC	1	16	139	27	animals	7	tiger
617	13	NC	1	16	139	27	animals	8	bear
617	13	NC	1	16	139	27	animals	9	armadillo
617	13	NC	1	16	139	27	animals	10	opossum
617	13	NC	1	16	139	27	animals	11	skunk
617	13	NC	1	16	139	27	animals	12	rabbit
617	13	NC	1	16	139	27	animals	13	weasel
617	13	NC	1	16	139	27	animals	14	leopard
617	13	NC	1	16	139	27	animals	15	giraffe
617	13	NC	1	16	139	27	animals	16	zebra
617	13	NC	1	16	139	27	animals	17	hippopotamus
617	13	NC	1	16	139	27	animals	18	Rhinoceros
618	1	NC	2	17	138	30	animals	1	rabbit
618	1	NC	2	17	138	30	animals	2	chicken
618	1	NC	2	17	138	30	animals	3	horse
618	1	NC	2	17	138	30	animals	4	cockateel
618	1	NC	2	17	138	30	animals	5	parrot
618	1	NC	2	17	138	30	animals	6	lion
618	1	NC	2	17	138	30	animals	7	tiger
618	1	NC	2	17	138	30	animals	8	chickadee
618	1	NC	2	17	138	30	animals	9	deer
618	1	NC	2	17	138	30	animals	10	elephant
618	1	NC	2	17	138	30	animals	11	camel
618	1	NC	2	17	138	30	animals	12	dramadary
618	1	NC	2	17	138	30	animals	13	cougar
618	1	NC	2	17	138	30	animals	14	gazelle
618	1	NC	2	17	138	30	animals	15	fox
618	1	NC	2	17	138	30	animals	18	chickadee
618	1	NC	2	17	138	30	animals	19	lizard
618	1	NC	2	17	138	30	animals	20	eagle
618	1	NC	2	17	138	30	animals	21	swallow
618	2	NC	2	17	143	30	animals	1	armadillo
618	2	NC	2	17	143	30	animals	2	bear
618	2	NC	2	17	143	30	animals	3	cougar
618	2	NC	2	17	143	30	animals	4	crocodile
618	2	NC	2	17	143	30	animals	5	alligator
618	2	NC	2	17	143	30	animals	6	dog
618	2	NC	2	17	143	30	animals	7	cat
618	2	NC	2	17	143	30	animals	8	snake
618	2	NC	2	17	143	30	animals	9	turtle
618	2	NC	2	17	143	30	animals	10	lizard
618	2	NC	2	17	143	30	animals	11	fish
618	2	NC	2	17	143	30	animals	12	pigeon
618	2	NC	2	17	143	30	animals	13	chicken
618	2	NC	2	17	143	30	animals	14	duck
618	2	NC	2	17	143	30	animals	15	goose
618	2	NC	2	17	143	30	animals	16	pelican
618	2	NC	2	17	143	30	animals	17	dove
618	2	NC	2	17	143	30	animals	18	heron
618	2	NC	2	17	143	30	animals	19	swallow
618	2	NC	2	17	143	30	animals	20	giraffe
618	2	NC	2	17	143	30	animals	21	elephant
618	2	NC	2	17	143	30	animals	22	lion
618	2	NC	2	17	143	30	animals	23	tiger
618	3	NC	2	17	144	29	animals	1	panda
618	3	NC	2	17	144	29	animals	2	poodle
618	3	NC	2	17	144	29	animals	3	porcupine
618	3	NC	2	17	144	29	animals	4	dog
618	3	NC	2	17	144	29	animals	5	cat
618	3	NC	2	17	144	29	animals	6	lizard
618	3	NC	2	17	144	29	animals	7	snake
618	3	NC	2	17	144	29	animals	8	amphibian
618	3	NC	2	17	144	29	animals	9	rattlesnake
618	3	NC	2	17	144	29	animals	10	black heron
618	3	NC	2	17	144	29	animals	11	boa
618	3	NC	2	17	144	29	animals	12	python
618	3	NC	2	17	144	29	animals	13	crow
618	3	NC	2	17	144	29	animals	14	bird
618	3	NC	2	17	144	29	animals	15	hogs
618	3	NC	2	17	144	29	animals	16	swan
618	3	NC	2	17	144	29	animals	17	pelican
618	3	NC	2	17	144	29	animals	19	pigeon
618	3	NC	2	17	144	29	animals	20	geese
618	3	NC	2	17	144	29	animals	21	duck
618	3	NC	2	17	144	29	animals	22	bears
618	3	NC	2	17	144	29	animals	23	gorilla
618	3	NC	2	17	144	29	animals	24	grizzlies
618	3	NC	2	17	144	29	animals	25	monkey
618	3	NC	2	17	144	29	animals	26	white bear
618	4	NC	2	17	144	30	animals	1	lizard
618	4	NC	2	17	144	30	animals	2	snake
618	4	NC	2	17	144	30	animals	3	fish
618	4	NC	2	17	144	30	animals	4	bird
618	4	NC	2	17	144	30	animals	5	parrot
618	4	NC	2	17	144	30	animals	6	horse
618	4	NC	2	17	144	30	animals	7	swallow
618	4	NC	2	17	144	30	animals	8	cat
618	4	NC	2	17	144	30	animals	9	dog
618	4	NC	2	17	144	30	animals	10	bears
618	4	NC	2	17	144	30	animals	11	lions
618	4	NC	2	17	144	30	animals	12	cougar
618	4	NC	2	17	144	30	animals	13	tiger
618	4	NC	2	17	144	30	animals	14	chihuahua
618	4	NC	2	17	144	30	animals	15	shepherd dog
618	4	NC	2	17	144	30	animals	16	whales
618	4	NC	2	17	144	30	animals	17	lynx
618	4	NC	2	17	144	30	animals	18	otter
618	4	NC	2	17	144	30	animals	19	turtles
618	4	NC	2	17	144	30	animals	20	monkey
618	4	NC	2	17	144	30	animals	21	camel
618	4	NC	2	17	144	30	animals	22	skunk
618	4	NC	2	17	144	30	animals	23	oppossum
618	4	NC	2	17	144	30	animals	24	humming bird
618	4	NC	2	17	144	30	animals	25	elephant
618	4	NC	2	17	144	30	animals	26	giraffe
618	5	NC	2	17	143	29	animals	1	Aardvark
618	5	NC	2	17	143	29	animals	2	beaver
618	5	NC	2	17	143	29	animals	3	bear
618	5	NC	2	17	143	29	animals	4	cow
618	5	NC	2	17	143	29	animals	5	fox
618	5	NC	2	17	143	29	animals	6	dog
618	5	NC	2	17	143	29	animals	7	heron
618	5	NC	2	17	143	29	animals	8	greyhound
618	5	NC	2	17	143	29	animals	9	kangaroo
618	5	NC	2	17	143	29	animals	10	lynx
618	5	NC	2	17	143	29	animals	11	mole
618	5	NC	2	17	143	29	animals	12	myna
618	5	NC	2	17	143	29	animals	13	owl
618	5	NC	2	17	143	29	animals	14	parrot
618	5	NC	2	17	143	29	animals	15	rooster
618	5	NC	2	17	143	29	animals	16	snake
618	6	NC	2	17	144	30	animals	1	armadillo
618	6	NC	2	17	144	30	animals	3	rat
618	6	NC	2	17	144	30	animals	4	rabbit
618	6	NC	2	17	144	30	animals	5	rodent
618	6	NC	2	17	144	30	animals	6	lion
618	6	NC	2	17	144	30	animals	7	bear
618	6	NC	2	17	144	30	animals	8	snake
618	6	NC	2	17	144	30	animals	9	turtle
618	6	NC	2	17	144	30	animals	11	fish
618	6	NC	2	17	144	30	animals	12	bird
618	6	NC	2	17	144	30	animals	13	humming bird
618	6	NC	2	17	144	30	animals	14	rabbit
618	6	NC	2	17	144	30	animals	15	swallow
618	6	NC	2	17	144	30	animals	16	beaver
618	6	NC	2	17	144	30	animals	17	lizard
618	7	NC	2	17	140	30	animals	1	lizard
618	7	NC	2	17	140	30	animals	2	snake
618	7	NC	2	17	140	30	animals	3	cat
618	7	NC	2	17	140	30	animals	4	canine
618	7	NC	2	17	140	30	animals	5	rodent
618	7	NC	2	17	140	30	animals	6	bird
618	7	NC	2	17	140	30	animals	7	fish
618	7	NC	2	17	140	30	animals	8	worm
618	7	NC	2	17	140	30	animals	9	insect
618	7	NC	2	17	140	30	animals	10	bacteria
618	7	NC	2	17	140	30	animals	11	mammal
618	7	NC	2	17	140	30	animals	12	human
618	7	NC	2	17	140	30	animals	13	fox
618	8	NC	2	17	143	30	animals	1	bacteria
618	8	NC	2	17	143	30	animals	2	mice
618	8	NC	2	17	143	30	animals	3	rats
618	8	NC	2	17	143	30	animals	4	capybara
618	8	NC	2	17	143	30	animals	5	bear
618	8	NC	2	17	143	30	animals	6	bunny
618	8	NC	2	17	143	30	animals	7	gorilla
618	8	NC	2	17	143	30	animals	8	tiger
618	8	NC	2	17	143	30	animals	9	lion
618	8	NC	2	17	143	30	animals	10	panther
618	8	NC	2	17	143	30	animals	11	bird
618	8	NC	2	17	143	30	animals	12	liquids
618	8	NC	2	17	143	30	animals	13	lions
618	8	NC	2	17	143	30	animals	14	pigs
618	8	NC	2	17	143	30	animals	15	cows
618	8	NC	2	17	143	30	animals	16	horse
618	8	NC	2	17	143	30	animals	17	zebra
618	9	NC	2	17	143	29	animals	1	serpent
618	9	NC	2	17	143	29	animals	2	lizard
618	9	NC	2	17	143	29	animals	3	fish
618	9	NC	2	17	143	29	animals	4	cat
618	9	NC	2	17	143	29	animals	5	coyote
618	9	NC	2	17	143	29	animals	6	dog
618	9	NC	2	17	143	29	animals	7	elephant
618	9	NC	2	17	143	29	animals	8	giraffe
618	9	NC	2	17	143	29	animals	9	bird
618	9	NC	2	17	143	29	animals	10	eagle
618	9	NC	2	17	143	29	animals	11	parrot
618	9	NC	2	17	143	29	animals	12	kangaroo
618	9	NC	2	17	143	29	animals	13	koala
618	9	NC	2	17	143	29	animals	14	deer
618	9	NC	2	17	143	29	animals	15	moose
618	9	NC	2	17	143	29	animals	16	iguana
618	9	NC	2	17	143	29	animals	17	frog
618	9	NC	2	17	143	29	animals	18	turtle
618	9	NC	2	17	143	29	animals	19	mollusk
618	10	NC	2	17	143	30	animals	1	flamingo
618	10	NC	2	17	143	30	animals	2	bullsnake
618	10	NC	2	17	143	30	animals	3	iguana
618	10	NC	2	17	143	30	animals	4	lizard
618	10	NC	2	17	143	30	animals	5	horny toad
618	10	NC	2	17	143	30	animals	6	ant
618	10	NC	2	17	143	30	animals	7	bee
618	10	NC	2	17	143	30	animals	8	cat
618	10	NC	2	17	143	30	animals	9	dog
618	10	NC	2	17	143	30	animals	10	horse
618	10	NC	2	17	143	30	animals	11	mule
618	10	NC	2	17	143	30	animals	12	donkey
618	10	NC	2	17	143	30	animals	13	lion
618	10	NC	2	17	143	30	animals	14	tiger
618	10	NC	2	17	143	30	animals	15	panther
618	10	NC	2	17	143	30	animals	16	jaguar
618	10	NC	2	17	143	30	animals	17	jackall
618	10	NC	2	17	143	30	animals	18	wolf
618	10	NC	2	17	143	30	animals	19	dingo
618	10	NC	2	17	143	30	animals	20	parrot
618	10	NC	2	17	143	30	animals	21	canary
618	10	NC	2	17	143	30	animals	22	bluebird
618	10	NC	2	17	143	30	animals	23	chickadee
618	10	NC	2	17	143	30	animals	24	swallow
618	10	NC	2	17	143	30	animals	25	crow
618	11	NC	2	17	142	30	animals	2	monkey
618	11	NC	2	17	142	30	animals	3	babbooon
618	11	NC	2	17	142	30	animals	4	gorilla
618	11	NC	2	17	142	30	animals	5	kangaroo
618	11	NC	2	17	142	30	animals	6	parrot
618	11	NC	2	17	142	30	animals	7	parakeet
618	11	NC	2	17	142	30	animals	8	lizard
618	11	NC	2	17	142	30	animals	10	snake
618	11	NC	2	17	142	30	animals	11	king snake
618	11	NC	2	17	142	30	animals	12	rattle snake
618	11	NC	2	17	142	30	animals	13	toad
618	11	NC	2	17	142	30	animals	14	frog
618	11	NC	2	17	142	30	animals	15	goat
618	11	NC	2	17	142	30	animals	16	cow
618	11	NC	2	17	142	30	animals	17	horse
618	11	NC	2	17	142	30	animals	18	deer
618	11	NC	2	17	142	30	animals	19	eagle
618	11	NC	2	17	142	30	animals	20	giraffe
618	11	NC	2	17	142	30	animals	21	cat
618	11	NC	2	17	142	30	animals	22	dog
618	11	NC	2	17	142	30	animals	23	duck
618	12	NC	2	17	144	30	animals	1	eagle
618	12	NC	2	17	144	30	animals	2	swallow
618	12	NC	2	17	144	30	animals	3	humming bird
618	12	NC	2	17	144	30	animals	4	heron
618	12	NC	2	17	144	30	animals	5	alligator
618	12	NC	2	17	144	30	animals	6	duck
618	12	NC	2	17	144	30	animals	7	dragon
618	12	NC	2	17	144	30	animals	8	dog
618	12	NC	2	17	144	30	animals	9	cat
618	12	NC	2	17	144	30	animals	10	ocelot
618	12	NC	2	17	144	30	animals	11	mongoose
618	12	NC	2	17	144	30	animals	12	skunk
618	12	NC	2	17	144	30	animals	13	racoon
618	12	NC	2	17	144	30	animals	14	possum
618	12	NC	2	17	144	30	animals	15	elephat
618	12	NC	2	17	144	30	animals	16	lion
618	12	NC	2	17	144	30	animals	17	tiger
618	13	NC	2	17	142	30	animals	1	frog
618	13	NC	2	17	142	30	animals	2	lizard
618	13	NC	2	17	142	30	animals	3	snake
618	13	NC	2	17	142	30	animals	4	turtle
618	13	NC	2	17	142	30	animals	5	monitor lizard
618	13	NC	2	17	142	30	animals	6	hound
618	13	NC	2	17	142	30	animals	7	toad
618	13	NC	2	17	142	30	animals	8	cat
618	13	NC	2	17	142	30	animals	9	dog
618	13	NC	2	17	142	30	animals	10	fish
618	13	NC	2	17	142	30	animals	11	koi
618	13	NC	2	17	142	30	animals	12	trout
618	13	NC	2	17	142	30	animals	13	parrot
618	13	NC	2	17	142	30	animals	14	parakeet
618	13	NC	2	17	142	30	animals	15	robin
618	13	NC	2	17	142	30	animals	16	eagle
618	13	NC	2	17	142	30	animals	17	pigeon
618	13	NC	2	17	142	30	animals	18	dove
618	13	NC	2	17	142	30	animals	19	penguin
618	13	NC	2	17	142	30	animals	20	lion
618	13	NC	2	17	142	30	animals	21	tiger
618	13	NC	2	17	142	30	animals	22	ocelot
618	13	NC	2	17	142	30	animals	23	panda
618	13	NC	2	17	142	30	animals	24	monkey
618	13	NC	2	17	142	30	animals	25	rhino
618	13	NC	2	17	142	30	animals	26	camel
618	13	NC	2	17	142	30	animals	27	giraffe
628	1	NC	2	13	143	27	animals	1	Snake
628	1	NC	2	13	143	27	animals	2	Dog
628	1	NC	2	13	143	27	animals	3	Cat
628	1	NC	2	13	143	27	animals	4	Rat
628	1	NC	2	13	143	27	animals	5	Mice
628	1	NC	2	13	143	27	animals	6	Hamster
628	1	NC	2	13	143	27	animals	7	Duck
628	1	NC	2	13	143	27	animals	8	Bird
628	1	NC	2	13	143	27	animals	9	Elephant
628	1	NC	2	13	143	27	animals	10	Tiger
628	1	NC	2	13	143	27	animals	11	Lion
628	1	NC	2	13	143	27	animals	12	Wolves
628	1	NC	2	13	143	27	animals	13	Bear
628	1	NC	2	13	143	27	animals	14	Giraffe
628	1	NC	2	13	143	27	animals	15	Geese
628	1	NC	2	13	143	27	animals	16	Seals
628	1	NC	2	13	143	27	animals	17	Otter
628	1	NC	2	13	143	27	animals	18	Fish
628	1	NC	2	13	143	27	animals	19	Donkey
628	1	NC	2	13	143	27	animals	20	Horse
628	2	NC	2	13	143	29	animals	1	Dog
628	2	NC	2	13	143	29	animals	2	Cat
628	2	NC	2	13	143	29	animals	3	Elephant
628	2	NC	2	13	143	29	animals	4	Fish
628	2	NC	2	13	143	29	animals	5	Giraffe
628	2	NC	2	13	143	29	animals	6	Bird
628	2	NC	2	13	143	29	animals	7	Lion
628	2	NC	2	13	143	29	animals	8	Hippo
628	2	NC	2	13	143	29	animals	10	Tiger
628	2	NC	2	13	143	29	animals	11	Bear
628	2	NC	2	13	143	29	animals	12	Horse
628	2	NC	2	13	143	29	animals	13	Snake
628	2	NC	2	13	143	29	animals	14	Seal
628	2	NC	2	13	143	29	animals	15	Otter
628	2	NC	2	13	143	29	animals	16	Whale
628	2	NC	2	13	143	29	animals	17	Penguin
628	2	NC	2	13	143	29	animals	18	Lamb
628	2	NC	2	13	143	29	animals	19	Goat
628	2	NC	2	13	143	29	animals	20	Chicken
628	2	NC	2	13	143	29	animals	21	Pig
628	2	NC	2	13	143	29	animals	22	Turkey
628	3	NC	2	13	139	30	animals	1	Parrot
628	3	NC	2	13	139	30	animals	2	Goat
628	3	NC	2	13	139	30	animals	3	Snake
628	3	NC	2	13	139	30	animals	4	Elephant
628	3	NC	2	13	139	30	animals	5	Fox
628	3	NC	2	13	139	30	animals	6	Giraffe
628	3	NC	2	13	139	30	animals	7	Rhino
628	3	NC	2	13	139	30	animals	8	Hippo
628	3	NC	2	13	139	30	animals	9	Hyena
628	3	NC	2	13	139	30	animals	10	Lion
628	3	NC	2	13	139	30	animals	11	Monkey
628	3	NC	2	13	139	30	animals	12	Tiger
628	3	NC	2	13	139	30	animals	13	Bear
628	3	NC	2	13	139	30	animals	14	Bird
628	3	NC	2	13	139	30	animals	15	Seal
628	3	NC	2	13	139	30	animals	16	Penguin
628	3	NC	2	13	139	30	animals	17	Horses
628	3	NC	2	13	139	30	animals	18	Ostrich
628	3	NC	2	13	139	30	animals	19	Kangaroo
628	5	NC	2	13	137	30	animals	1	Beaver
628	5	NC	2	13	137	30	animals	2	Cat
628	5	NC	2	13	137	30	animals	3	Dog
628	5	NC	2	13	137	30	animals	4	Lion
628	5	NC	2	13	137	30	animals	5	Horse
628	5	NC	2	13	137	30	animals	6	Snake
628	5	NC	2	13	137	30	animals	7	Monkey
628	5	NC	2	13	137	30	animals	8	Gorilla
628	5	NC	2	13	137	30	animals	9	Panda
628	5	NC	2	13	137	30	animals	10	Owl
628	5	NC	2	13	137	30	animals	11	Ostrich
628	5	NC	2	13	137	30	animals	12	Flamingo
628	5	NC	2	13	137	30	animals	13	Hampster
628	5	NC	2	13	137	30	animals	14	Rabbit
628	5	NC	2	13	137	30	animals	15	Cow
628	5	NC	2	13	137	30	animals	16	Horse
628	6	NC	2	13	136	28	animals	1	Lion
628	6	NC	2	13	136	28	animals	2	Tiger
628	6	NC	2	13	136	28	animals	3	Bear
628	6	NC	2	13	136	28	animals	4	Elephant
628	6	NC	2	13	136	28	animals	5	Kangaroo
628	6	NC	2	13	136	28	animals	6	Horse
628	6	NC	2	13	136	28	animals	7	Dog
628	6	NC	2	13	136	28	animals	8	Cat
628	6	NC	2	13	136	28	animals	9	Rabbit
628	6	NC	2	13	136	28	animals	10	Bird
628	6	NC	2	13	136	28	animals	11	Dinosaur
628	6	NC	2	13	136	28	animals	12	Snake
628	6	NC	2	13	136	28	animals	13	Chipmunk
628	6	NC	2	13	136	28	animals	14	Chicken
628	6	NC	2	13	136	28	animals	15	Pig
628	6	NC	2	13	136	28	animals	16	Guinea Pig
628	7	NC	2	13	144	29	animals	1	Dog
628	7	NC	2	13	144	29	animals	2	Cat
628	7	NC	2	13	144	29	animals	3	Giraffe
628	7	NC	2	13	144	29	animals	4	Bird
628	7	NC	2	13	144	29	animals	5	Mouse
628	7	NC	2	13	144	29	animals	6	Rat
628	7	NC	2	13	144	29	animals	7	Pigeon
628	7	NC	2	13	144	29	animals	8	Fox
628	7	NC	2	13	144	29	animals	9	Elephant
628	7	NC	2	13	144	29	animals	10	Lion
628	7	NC	2	13	144	29	animals	11	Tiger
628	7	NC	2	13	144	29	animals	12	Bear
628	7	NC	2	13	144	29	animals	13	Alligator
628	7	NC	2	13	144	29	animals	14	Ostritch
628	7	NC	2	13	144	29	animals	15	Monkey
628	7	NC	2	13	144	29	animals	16	Hippo
628	7	NC	2	13	144	29	animals	17	Snakes
628	7	NC	2	13	144	29	animals	18	Rabbit
628	7	NC	2	13	144	29	animals	19	Chicken
628	7	NC	2	13	144	29	animals	20	Cow
628	7	NC	2	13	144	29	animals	21	Pig
628	7	NC	2	13	144	29	animals	22	Sheep
628	7	NC	2	13	144	29	animals	23	Horse
628	8	NC	2	13	142	28	animals	1	Dog
628	8	NC	2	13	142	28	animals	2	Cat
628	8	NC	2	13	142	28	animals	3	Donkey
628	8	NC	2	13	142	28	animals	4	Horse
628	8	NC	2	13	142	28	animals	5	Elephant
628	8	NC	2	13	142	28	animals	6	Giraffe
628	8	NC	2	13	142	28	animals	7	Coyote
628	8	NC	2	13	142	28	animals	8	Snake
628	8	NC	2	13	142	28	animals	9	Hen
628	8	NC	2	13	142	28	animals	10	Pig
628	8	NC	2	13	142	28	animals	11	Cow
628	8	NC	2	13	142	28	animals	12	Horse
628	8	NC	2	13	142	28	animals	13	Buffalo
628	8	NC	2	13	142	28	animals	14	Monkey
628	8	NC	2	13	142	28	animals	15	Koala
628	8	NC	2	13	142	28	animals	16	Bear
628	8	NC	2	13	142	28	animals	17	Alligator
628	8	NC	2	13	142	28	animals	18	Fish
628	8	NC	2	13	142	28	animals	19	Birds
628	8	NC	2	13	142	28	animals	20	Skunk
628	9	NC	2	13	138	29	animals	1	Monkey
628	9	NC	2	13	138	29	animals	2	Hippo
628	9	NC	2	13	138	29	animals	3	Elephant
628	9	NC	2	13	138	29	animals	4	Camel
628	9	NC	2	13	138	29	animals	5	Tiger
628	9	NC	2	13	138	29	animals	6	Bear
628	9	NC	2	13	138	29	animals	7	Snake
628	9	NC	2	13	138	29	animals	8	Giraffe
628	9	NC	2	13	138	29	animals	9	Snake
628	9	NC	2	13	138	29	animals	10	Bird
628	9	NC	2	13	138	29	animals	11	Turtle
628	9	NC	2	13	138	29	animals	12	Hyena
628	9	NC	2	13	138	29	animals	13	Cat
628	9	NC	2	13	138	29	animals	14	Dog
628	9	NC	2	13	138	29	animals	15	Panda
628	9	NC	2	13	138	29	animals	16	Rat
628	9	NC	2	13	138	29	animals	17	Goats
628	9	NC	2	13	138	29	animals	18	Guinea Pig
628	9	NC	2	13	138	29	animals	19	Rabbit
628	9	NC	2	13	138	29	animals	20	Chicken
628	9	NC	2	13	138	29	animals	21	Cows
641	1	NC	1	16	140	29	animals	1	Fox
641	1	NC	1	16	140	29	animals	3	Giraffe
641	1	NC	1	16	140	29	animals	4	Dog
641	1	NC	1	16	140	29	animals	5	Zebra
641	1	NC	1	16	140	29	animals	6	Bear
641	1	NC	1	16	140	29	animals	7	Kangaroo
641	1	NC	1	16	140	29	animals	8	Rhino
641	1	NC	1	16	140	29	animals	9	Lion
641	1	NC	1	16	140	29	animals	11	Fox
641	1	NC	1	16	140	29	animals	12	Muskrat
641	1	NC	1	16	140	29	animals	13	Beaver
641	1	NC	1	16	140	29	animals	14	Wolverine
641	1	NC	1	16	140	29	animals	15	Snake
641	1	NC	1	16	140	29	animals	16	Elk
641	1	NC	1	16	140	29	animals	17	Pig
641	1	NC	1	16	140	29	animals	18	Horse
641	1	NC	1	16	140	29	animals	19	Chicken
641	1	NC	1	16	140	29	animals	21	elephant
641	1	NC	1	16	140	29	animals	22	camel
641	2	NC	1	16	142	29	animals	1	Bear
641	2	NC	1	16	142	29	animals	2	Moose
641	2	NC	1	16	142	29	animals	3	Cow
641	2	NC	1	16	142	29	animals	4	Dog
641	2	NC	1	16	142	29	animals	5	Cat
641	2	NC	1	16	142	29	animals	6	Porcupine
641	2	NC	1	16	142	29	animals	7	Antelope
641	2	NC	1	16	142	29	animals	8	Deer
641	2	NC	1	16	142	29	animals	9	Pig
641	2	NC	1	16	142	29	animals	10	Horse
641	2	NC	1	16	142	29	animals	11	Wolverine
641	2	NC	1	16	142	29	animals	12	Cheetah
641	2	NC	1	16	142	29	animals	13	Giraffe
641	2	NC	1	16	142	29	animals	14	Rhino
641	2	NC	1	16	142	29	animals	15	Hippo
641	2	NC	1	16	142	29	animals	16	Elephant
641	2	NC	1	16	142	29	animals	17	Rat
641	2	NC	1	16	142	29	animals	18	Zebra
641	2	NC	1	16	142	29	animals	19	Warthog
641	2	NC	1	16	142	29	animals	20	Mole
641	2	NC	1	16	142	29	animals	21	Mouse
641	3	NC	1	16	143	28	animals	1	Cat
641	3	NC	1	16	143	28	animals	2	Dog
641	3	NC	1	16	143	28	animals	3	Hippo
641	3	NC	1	16	143	28	animals	4	Mouse
641	3	NC	1	16	143	28	animals	5	Elephant
641	3	NC	1	16	143	28	animals	6	Lion
641	3	NC	1	16	143	28	animals	7	Giraffe
641	3	NC	1	16	143	28	animals	9	Puma
641	3	NC	1	16	143	28	animals	10	Wombat
641	3	NC	1	16	143	28	animals	11	Armadillo
641	3	NC	1	16	143	28	animals	12	Fox
641	3	NC	1	16	143	28	animals	13	Wolf
641	3	NC	1	16	143	28	animals	16	Groundhog
641	3	NC	1	16	143	28	animals	17	Ram
641	3	NC	1	16	143	28	animals	18	Cow
641	3	NC	1	16	143	28	animals	19	Horse
641	3	NC	1	16	143	28	animals	20	Sheep
641	3	NC	1	16	143	28	animals	21	Pig
641	4	NC	1	16	137	29	animals	1	Lion
641	4	NC	1	16	137	29	animals	2	Dog
641	4	NC	1	16	137	29	animals	3	Cat
641	4	NC	1	16	137	29	animals	4	Otter
641	4	NC	1	16	137	29	animals	5	Rhino
641	4	NC	1	16	137	29	animals	8	Elephant
641	4	NC	1	16	137	29	animals	9	Tiger
641	4	NC	1	16	137	29	animals	10	Monkey
641	4	NC	1	16	137	29	animals	12	Lion
641	4	NC	1	16	137	29	animals	13	Bobcat
641	4	NC	1	16	137	29	animals	14	Fox
641	4	NC	1	16	137	29	animals	15	Rabbit
641	4	NC	1	16	137	29	animals	16	Squirrel
641	4	NC	1	16	137	29	animals	17	Deer
641	4	NC	1	16	137	29	animals	18	Pig
641	4	NC	1	16	137	29	animals	19	Cow
641	4	NC	1	16	137	29	animals	20	Horse
641	4	NC	1	16	137	29	animals	21	Wolf
641	4	NC	1	16	137	29	animals	22	Bear
641	4	NC	1	16	137	29	animals	23	Kangaroo
641	4	NC	1	16	137	29	animals	24	Alligator
641	5	NC	1	16	142	30	animals	1	Fox
641	5	NC	1	16	142	30	animals	2	Skunk
641	5	NC	1	16	142	30	animals	3	Cat
641	5	NC	1	16	142	30	animals	4	Dog
641	5	NC	1	16	142	30	animals	5	Mouse
641	5	NC	1	16	142	30	animals	6	Rhino
641	5	NC	1	16	142	30	animals	7	Elephant
641	5	NC	1	16	142	30	animals	8	Lion
641	5	NC	1	16	142	30	animals	9	Cheetah
641	5	NC	1	16	142	30	animals	10	Monkey
641	5	NC	1	16	142	30	animals	11	Elk
641	5	NC	1	16	142	30	animals	12	Moose
641	5	NC	1	16	142	30	animals	13	Deer
641	5	NC	1	16	142	30	animals	14	Wildcat
641	5	NC	1	16	142	30	animals	15	Python
641	5	NC	1	16	142	30	animals	16	Wolf
641	5	NC	1	16	142	30	animals	17	Bear
641	5	NC	1	16	142	30	animals	18	Antelope
641	5	NC	1	16	142	30	animals	19	Chipmunk
641	6	NC	1	16	143	30	animals	1	Fox
641	6	NC	1	16	143	30	animals	2	Deer
641	6	NC	1	16	143	30	animals	3	Skunk
641	6	NC	1	16	143	30	animals	4	Rat
641	6	NC	1	16	143	30	animals	5	Mouse
641	6	NC	1	16	143	30	animals	6	Lion
641	6	NC	1	16	143	30	animals	7	Tiger
641	6	NC	1	16	143	30	animals	8	Antelope
641	6	NC	1	16	143	30	animals	10	Elephant
641	6	NC	1	16	143	30	animals	11	Giraffe
641	6	NC	1	16	143	30	animals	12	Kangaroo
641	6	NC	1	16	143	30	animals	13	Cat
641	6	NC	1	16	143	30	animals	14	Dog
641	6	NC	1	16	143	30	animals	15	Giraffe
641	6	NC	1	16	143	30	animals	16	Monkey
641	6	NC	1	16	143	30	animals	17	Ape
641	6	NC	1	16	143	30	animals	18	Moose
641	6	NC	1	16	143	30	animals	19	Mammoth
644	1	NC	2	14	142	29	animals	1	Donkey
644	1	NC	2	14	142	29	animals	2	Horse
644	1	NC	2	14	142	29	animals	3	Cow
644	1	NC	2	14	142	29	animals	4	Rhino
644	1	NC	2	14	142	29	animals	5	Mule
644	1	NC	2	14	142	29	animals	6	Tiger
644	1	NC	2	14	142	29	animals	7	Bull
644	1	NC	2	14	142	29	animals	8	Lion
644	1	NC	2	14	142	29	animals	9	Zebra
644	1	NC	2	14	142	29	animals	10	Camel
644	1	NC	2	14	142	29	animals	11	Dog
644	1	NC	2	14	142	29	animals	12	Cat
644	1	NC	2	14	142	29	animals	13	Monkey
644	1	NC	2	14	142	29	animals	14	Ape
644	1	NC	2	14	142	29	animals	15	Baboon
644	1	NC	2	14	142	29	animals	16	Fox
644	1	NC	2	14	142	29	animals	17	Coyote
644	1	NC	2	14	142	29	animals	18	Goat
644	1	NC	2	14	142	29	animals	19	Sheep
644	1	NC	2	14	142	29	animals	20	Lamb
644	2	NC	2	14	143	30	animals	1	Bear
644	2	NC	2	14	143	30	animals	2	Elk
644	2	NC	2	14	143	30	animals	3	Horse
644	2	NC	2	14	143	30	animals	4	Goat
644	2	NC	2	14	143	30	animals	5	Elephant
644	2	NC	2	14	143	30	animals	6	Sheep
644	2	NC	2	14	143	30	animals	7	Reindeer
644	2	NC	2	14	143	30	animals	8	Moose
644	2	NC	2	14	143	30	animals	9	Lion
644	2	NC	2	14	143	30	animals	10	Dog
644	2	NC	2	14	143	30	animals	11	Cat
644	2	NC	2	14	143	30	animals	12	Whale
644	2	NC	2	14	143	30	animals	13	Sealion
644	2	NC	2	14	143	30	animals	14	Penguin
644	2	NC	2	14	143	30	animals	15	Bird
644	3	NC	2	14	141	29	animals	2	Kangaroo
644	3	NC	2	14	141	29	animals	3	Dog
644	3	NC	2	14	141	29	animals	4	Cat
644	3	NC	2	14	141	29	animals	5	Rat
644	3	NC	2	14	141	29	animals	6	Muskrat
644	3	NC	2	14	141	29	animals	7	Gopher
644	3	NC	2	14	141	29	animals	8	Elephant
644	3	NC	2	14	141	29	animals	9	Lion
644	3	NC	2	14	141	29	animals	10	Tiger
644	3	NC	2	14	141	29	animals	11	Bear
644	3	NC	2	14	141	29	animals	12	Deer
644	3	NC	2	14	141	29	animals	13	Moose
644	3	NC	2	14	141	29	animals	14	Antelop
644	3	NC	2	14	141	29	animals	15	Rhinoceros
644	3	NC	2	14	141	29	animals	16	Buffalo
644	4	NC	2	14	144	30	animals	1	Cat
644	4	NC	2	14	144	30	animals	2	Tiger
644	4	NC	2	14	144	30	animals	3	Dog
644	4	NC	2	14	144	30	animals	4	Monkey
644	4	NC	2	14	144	30	animals	5	Mule
644	4	NC	2	14	144	30	animals	6	Horse
644	4	NC	2	14	144	30	animals	7	Whale
644	4	NC	2	14	144	30	animals	8	Porpoise
644	4	NC	2	14	144	30	animals	9	Kangaroo
644	4	NC	2	14	144	30	animals	10	Bird
644	4	NC	2	14	144	30	animals	11	Bear
644	4	NC	2	14	144	30	animals	12	Giraffe
644	4	NC	2	14	144	30	animals	13	Hippy
644	4	NC	2	14	144	30	animals	14	Elephant
644	4	NC	2	14	144	30	animals	15	Ostrich
644	4	NC	2	14	144	30	animals	16	Kangaroo
644	5	NC	2	14	139	30	animals	1	Cat
644	5	NC	2	14	139	30	animals	2	Dog
644	5	NC	2	14	139	30	animals	3	Rat
644	5	NC	2	14	139	30	animals	4	Camel
644	5	NC	2	14	139	30	animals	5	Horse
644	5	NC	2	14	139	30	animals	6	Cow
644	5	NC	2	14	139	30	animals	7	Bull
644	5	NC	2	14	139	30	animals	8	Camel
644	5	NC	2	14	139	30	animals	9	Rhinoceros
644	5	NC	2	14	139	30	animals	10	Elephant
644	5	NC	2	14	139	30	animals	11	Oxen
644	5	NC	2	14	139	30	animals	12	Buffalo
644	5	NC	2	14	139	30	animals	13	Donkey
644	5	NC	2	14	139	30	animals	14	Lion
644	5	NC	2	14	139	30	animals	15	Tiger
644	5	NC	2	14	139	30	animals	16	Panther
644	5	NC	2	14	139	30	animals	17	Bear
644	5	NC	2	14	139	30	animals	18	Koala
644	6	NC	2	14	144	30	animals	1	Cat
644	6	NC	2	14	144	30	animals	2	Dog
644	6	NC	2	14	144	30	animals	3	Rhinoceros
644	6	NC	2	14	144	30	animals	4	Elephant
644	6	NC	2	14	144	30	animals	5	Otter
644	6	NC	2	14	144	30	animals	6	Lion
644	6	NC	2	14	144	30	animals	7	Tiger
644	6	NC	2	14	144	30	animals	8	Rat
644	6	NC	2	14	144	30	animals	9	Mouse
644	6	NC	2	14	144	30	animals	10	Horse
644	6	NC	2	14	144	30	animals	11	Mule
644	6	NC	2	14	144	30	animals	12	Donkey
644	6	NC	2	14	144	30	animals	13	Whale
644	6	NC	2	14	144	30	animals	14	Porpoise
644	6	NC	2	14	144	30	animals	15	Sealion
644	6	NC	2	14	144	30	animals	16	Deer
644	6	NC	2	14	144	30	animals	17	Moose
644	6	NC	2	14	144	30	animals	18	Elk
644	6	NC	2	14	144	30	animals	19	Racoon
644	6	NC	2	14	144	30	animals	20	Skunk
644	6	NC	2	14	144	30	animals	21	Fox
644	7	NC	2	14	141	29	animals	1	Dog
644	7	NC	2	14	141	29	animals	2	Buffalo
644	7	NC	2	14	141	29	animals	3	Cat
644	7	NC	2	14	141	29	animals	4	Lion
644	7	NC	2	14	141	29	animals	5	Donkey
644	7	NC	2	14	141	29	animals	6	Tiger
644	7	NC	2	14	141	29	animals	7	Horse
644	7	NC	2	14	141	29	animals	8	Cow
644	7	NC	2	14	141	29	animals	9	Elephant
644	7	NC	2	14	141	29	animals	10	Rhino
644	7	NC	2	14	141	29	animals	11	Deer
644	7	NC	2	14	141	29	animals	12	Fawn
644	7	NC	2	14	141	29	animals	13	Monkey
644	7	NC	2	14	141	29	animals	14	Donkey
644	7	NC	2	14	141	29	animals	15	Beaver
644	8	NC	2	14	137	29	animals	1	Dog
644	8	NC	2	14	137	29	animals	2	Pig
644	8	NC	2	14	137	29	animals	3	Cat
644	8	NC	2	14	137	29	animals	4	Elephant
644	8	NC	2	14	137	29	animals	5	Wolf
644	8	NC	2	14	137	29	animals	6	Fox
644	8	NC	2	14	137	29	animals	7	Rat
644	8	NC	2	14	137	29	animals	8	Horse
644	8	NC	2	14	137	29	animals	9	Donkey
644	8	NC	2	14	137	29	animals	10	Mule
644	8	NC	2	14	137	29	animals	11	Tiger
644	8	NC	2	14	137	29	animals	12	Lion
644	8	NC	2	14	137	29	animals	13	Panther
644	8	NC	2	14	137	29	animals	14	Monkey
644	8	NC	2	14	137	29	animals	15	Baboon
644	8	NC	2	14	137	29	animals	16	Elephant
644	8	NC	2	14	137	29	animals	17	Tiger
644	8	NC	2	14	137	29	animals	18	Camel
644	8	NC	2	14	137	29	animals	19	Zebra
647	1	NC	2	18	140	30	animals	1	Dog
647	1	NC	2	18	140	30	animals	2	Cat
647	1	NC	2	18	140	30	animals	3	Sealion
647	1	NC	2	18	140	30	animals	4	Rhino
647	1	NC	2	18	140	30	animals	6	Pig
647	1	NC	2	18	140	30	animals	7	Sheet
647	1	NC	2	18	140	30	animals	8	Seal
647	1	NC	2	18	140	30	animals	9	Lion
647	1	NC	2	18	140	30	animals	10	Tiger
647	1	NC	2	18	140	30	animals	11	Leopard
647	1	NC	2	18	140	30	animals	12	Jaguar
647	1	NC	2	18	140	30	animals	13	Hippo
647	1	NC	2	18	140	30	animals	14	Mountain Goat
647	1	NC	2	18	140	30	animals	15	Mule
647	1	NC	2	18	140	30	animals	16	Buffalo
647	1	NC	2	18	140	30	animals	17	Horse
647	1	NC	2	18	140	30	animals	18	Donkey
647	1	NC	2	18	140	30	animals	19	Llama
647	1	NC	2	18	140	30	animals	20	Boa
647	2	NC	2	18	143	30	animals	1	Dog
647	2	NC	2	18	143	30	animals	2	Cat
647	2	NC	2	18	143	30	animals	3	Gopher
647	2	NC	2	18	143	30	animals	4	Raccoon
647	2	NC	2	18	143	30	animals	5	Cow
647	2	NC	2	18	143	30	animals	6	Sheep
647	2	NC	2	18	143	30	animals	7	Horse
647	2	NC	2	18	143	30	animals	8	Pig
647	2	NC	2	18	143	30	animals	9	Elephant
647	2	NC	2	18	143	30	animals	10	Giraffe
647	2	NC	2	18	143	30	animals	11	Hippo
647	2	NC	2	18	143	30	animals	12	Rhino
647	2	NC	2	18	143	30	animals	13	Moose
647	2	NC	2	18	143	30	animals	14	Elk
647	2	NC	2	18	143	30	animals	15	Deer
647	2	NC	2	18	143	30	animals	16	Antelope
647	2	NC	2	18	143	30	animals	17	Coyote
647	2	NC	2	18	143	30	animals	18	Mountain Goat
647	2	NC	2	18	143	30	animals	19	Mountan Sheep
647	2	NC	2	18	143	30	animals	20	Kngaroo
647	2	NC	2	18	143	30	animals	21	Wallabee
647	3	NC	2	18	143	30	animals	1	Gopher
647	3	NC	2	18	143	30	animals	2	Cow
647	3	NC	2	18	143	30	animals	3	Beaver
647	3	NC	2	18	143	30	animals	4	Badger
647	3	NC	2	18	143	30	animals	5	Yak
647	3	NC	2	18	143	30	animals	6	Buffalo
647	3	NC	2	18	143	30	animals	7	Lamb
647	3	NC	2	18	143	30	animals	8	Horses
647	3	NC	2	18	143	30	animals	9	Pig
647	3	NC	2	18	143	30	animals	10	Llama
647	3	NC	2	18	143	30	animals	11	Antelope
647	3	NC	2	18	143	30	animals	12	Deer
647	3	NC	2	18	143	30	animals	13	Wolf
647	3	NC	2	18	143	30	animals	14	Coyote
647	3	NC	2	18	143	30	animals	15	Dog
647	3	NC	2	18	143	30	animals	16	Cat
647	3	NC	2	18	143	30	animals	17	Guinea Pig
647	3	NC	2	18	143	30	animals	18	Pig
647	3	NC	2	18	143	30	animals	19	Monkey
647	3	NC	2	18	143	30	animals	20	Muskrat
647	3	NC	2	18	143	30	animals	21	Tiger
647	3	NC	2	18	143	30	animals	22	Lion
647	4	NC	2	18	143	29	animals	1	Dog
647	4	NC	2	18	143	29	animals	2	Cat
647	4	NC	2	18	143	29	animals	3	Goat
647	4	NC	2	18	143	29	animals	4	Sheep
647	4	NC	2	18	143	29	animals	5	Cow
647	4	NC	2	18	143	29	animals	6	Horse
647	4	NC	2	18	143	29	animals	7	Zebra
647	4	NC	2	18	143	29	animals	8	Giraffe
647	4	NC	2	18	143	29	animals	9	Coyote
647	4	NC	2	18	143	29	animals	10	Leopard
647	4	NC	2	18	143	29	animals	11	Cougar
647	4	NC	2	18	143	29	animals	12	Beaver
647	4	NC	2	18	143	29	animals	13	Oppossum
647	4	NC	2	18	143	29	animals	14	Mouse
647	4	NC	2	18	143	29	animals	15	Rat
647	4	NC	2	18	143	29	animals	16	Guinea Pig
647	4	NC	2	18	143	29	animals	17	Prairie Dog
647	4	NC	2	18	143	29	animals	18	Lion
647	4	NC	2	18	143	29	animals	19	Tiger
647	4	NC	2	18	143	29	animals	20	Cheetah
647	4	NC	2	18	143	29	animals	21	Racoon
647	4	NC	2	18	143	29	animals	22	Squirrel
647	4	NC	2	18	143	29	animals	23	Rhino
647	4	NC	2	18	143	29	animals	24	Hippo
647	5	NC	2	18	143	30	animals	1	Cow
647	5	NC	2	18	143	30	animals	2	Horse
647	5	NC	2	18	143	30	animals	3	Sheep
647	5	NC	2	18	143	30	animals	4	Donkey
647	5	NC	2	18	143	30	animals	5	Mule
647	5	NC	2	18	143	30	animals	6	Camel
647	5	NC	2	18	143	30	animals	7	Cat
647	5	NC	2	18	143	30	animals	8	Tiger
647	5	NC	2	18	143	30	animals	9	Lion
647	5	NC	2	18	143	30	animals	10	Leopard
647	5	NC	2	18	143	30	animals	11	Panther
647	5	NC	2	18	143	30	animals	12	Puma
647	5	NC	2	18	143	30	animals	13	Coyote
647	5	NC	2	18	143	30	animals	14	Wolf
647	5	NC	2	18	143	30	animals	15	Antelope
647	5	NC	2	18	143	30	animals	16	Deer
647	5	NC	2	18	143	30	animals	17	Moose
647	5	NC	2	18	143	30	animals	18	Caribou
647	5	NC	2	18	143	30	animals	19	Rhinoceros
647	5	NC	2	18	143	30	animals	20	Hippopotamus
647	5	NC	2	18	143	30	animals	21	Elephant
647	6	NC	2	18	142	30	animals	1	Tiger
647	6	NC	2	18	142	30	animals	2	Lion
647	6	NC	2	18	142	30	animals	3	Giraffe
647	6	NC	2	18	142	30	animals	4	Zebra
647	6	NC	2	18	142	30	animals	5	Deer
647	6	NC	2	18	142	30	animals	6	Antelope
647	6	NC	2	18	142	30	animals	7	Elephant
647	6	NC	2	18	142	30	animals	8	Pig
647	6	NC	2	18	142	30	animals	9	Anteater
647	6	NC	2	18	142	30	animals	10	Horse
647	6	NC	2	18	142	30	animals	11	Cow
647	6	NC	2	18	142	30	animals	12	Sheep
647	6	NC	2	18	142	30	animals	13	Goat
647	6	NC	2	18	142	30	animals	14	Moose
647	6	NC	2	18	142	30	animals	15	Elk
647	6	NC	2	18	142	30	animals	16	Dog
647	6	NC	2	18	142	30	animals	17	Cat
647	6	NC	2	18	142	30	animals	18	Ox
647	6	NC	2	18	142	30	animals	19	Mule
647	7	NC	2	18	141	30	animals	1	Deer
647	7	NC	2	18	141	30	animals	2	Steer
647	7	NC	2	18	141	30	animals	3	Wolf
647	7	NC	2	18	141	30	animals	4	Fox
647	7	NC	2	18	141	30	animals	5	Antelope
647	7	NC	2	18	141	30	animals	6	Coyote
647	7	NC	2	18	141	30	animals	7	Moose
647	7	NC	2	18	141	30	animals	8	Caribou
647	7	NC	2	18	141	30	animals	9	Mountain Goat
647	7	NC	2	18	141	30	animals	10	Sheep
647	7	NC	2	18	141	30	animals	11	Tiger
647	7	NC	2	18	141	30	animals	12	Lion
647	7	NC	2	18	141	30	animals	13	Elephant
647	7	NC	2	18	141	30	animals	14	Seal
647	7	NC	2	18	141	30	animals	15	Pig
647	7	NC	2	18	141	30	animals	16	Giraffe
647	7	NC	2	18	141	30	animals	17	Cat
647	7	NC	2	18	141	30	animals	18	Dog
647	8	NC	2	18	144	30	animals	1	Dog
647	8	NC	2	18	144	30	animals	2	Wolf
647	8	NC	2	18	144	30	animals	3	Cat
647	8	NC	2	18	144	30	animals	4	Mouse
647	8	NC	2	18	144	30	animals	5	Rat
647	8	NC	2	18	144	30	animals	6	Squirrel
647	8	NC	2	18	144	30	animals	7	Gopher
647	8	NC	2	18	144	30	animals	8	Lion
647	8	NC	2	18	144	30	animals	9	Tiger
647	8	NC	2	18	144	30	animals	10	Leopard
647	8	NC	2	18	144	30	animals	11	Fox
647	8	NC	2	18	144	30	animals	12	Bear
647	8	NC	2	18	144	30	animals	13	Ox
647	8	NC	2	18	144	30	animals	14	Horse
647	8	NC	2	18	144	30	animals	15	Cow
647	8	NC	2	18	144	30	animals	16	Pig
647	8	NC	2	18	144	30	animals	17	Lamb
647	8	NC	2	18	144	30	animals	18	Sheep
647	8	NC	2	18	144	30	animals	19	Llama
647	8	NC	2	18	144	30	animals	20	Elephant
647	8	NC	2	18	144	30	animals	21	Giraffe
647	8	NC	2	18	144	30	animals	22	Monkey
647	8	NC	2	18	144	30	animals	23	Gorilla
647	8	NC	2	18	144	30	animals	24	Polar Bear
647	8	NC	2	18	144	30	animals	25	Moost
647	8	NC	2	18	144	30	animals	26	Elk
647	8	NC	2	18	144	30	animals	27	Antelope
647	8	NC	2	18	144	30	animals	28	Deer
647	9	NC	2	18	143	30	animals	1	Dog
647	9	NC	2	18	143	30	animals	2	Cat
647	9	NC	2	18	143	30	animals	3	Gopher
647	9	NC	2	18	143	30	animals	4	Horse
647	9	NC	2	18	143	30	animals	5	Donkey
647	9	NC	2	18	143	30	animals	6	Mule
647	9	NC	2	18	143	30	animals	7	Elk
647	9	NC	2	18	143	30	animals	8	Zebra
647	9	NC	2	18	143	30	animals	9	Deer
647	9	NC	2	18	143	30	animals	10	Antelope
647	9	NC	2	18	143	30	animals	11	Mountain Goat
647	9	NC	2	18	143	30	animals	12	Mountain Sheep
647	9	NC	2	18	143	30	animals	13	Lion
647	9	NC	2	18	143	30	animals	14	Tiger
647	9	NC	2	18	143	30	animals	15	Ocelot
647	9	NC	2	18	143	30	animals	16	Panther
647	9	NC	2	18	143	30	animals	17	Elephant
647	9	NC	2	18	143	30	animals	18	Rhinoceros
647	9	NC	2	18	143	30	animals	19	Hippopotamus
647	9	NC	2	18	143	30	animals	20	Camel
647	9	NC	2	18	143	30	animals	21	Giraffe
647	9	NC	2	18	143	30	animals	22	Beaver
647	9	NC	2	18	143	30	animals	23	Racoon
647	9	NC	2	18	143	30	animals	24	Porcupine
647	9	NC	2	18	143	30	animals	25	Opossum
647	9	NC	2	18	143	30	animals	26	Rat
647	9	NC	2	18	143	30	animals	27	Mouse
647	10	NC	2	18	144	30	animals	1	Dog
647	10	NC	2	18	144	30	animals	2	Cat
647	10	NC	2	18	144	30	animals	3	Giraffe
647	10	NC	2	18	144	30	animals	4	Squirrel
647	10	NC	2	18	144	30	animals	5	Guinea Pig
647	10	NC	2	18	144	30	animals	6	Lion
647	10	NC	2	18	144	30	animals	7	Tiger
647	10	NC	2	18	144	30	animals	8	Hippopotamus
647	10	NC	2	18	144	30	animals	9	Rhinoceros
647	10	NC	2	18	144	30	animals	10	Elephant
647	10	NC	2	18	144	30	animals	11	Oscelot
647	10	NC	2	18	144	30	animals	12	Civet
647	10	NC	2	18	144	30	animals	13	Wolf
647	10	NC	2	18	144	30	animals	14	Dog
647	10	NC	2	18	144	30	animals	15	Fox
647	10	NC	2	18	144	30	animals	16	Tiger
647	10	NC	2	18	144	30	animals	17	Bear
647	11	NC	2	18	143	30	animals	1	Bear
647	11	NC	2	18	143	30	animals	2	Cat
647	11	NC	2	18	143	30	animals	3	Wolf
647	11	NC	2	18	143	30	animals	4	Lynx
647	11	NC	2	18	143	30	animals	5	Antelope
647	11	NC	2	18	143	30	animals	6	Beaver
647	11	NC	2	18	143	30	animals	7	Muskrat
647	11	NC	2	18	143	30	animals	8	Ox
647	11	NC	2	18	143	30	animals	9	Horse
647	11	NC	2	18	143	30	animals	10	Cow
647	11	NC	2	18	143	30	animals	11	Pig
647	11	NC	2	18	143	30	animals	12	Sheep
647	11	NC	2	18	143	30	animals	13	Cat
647	11	NC	2	18	143	30	animals	14	Dog
647	11	NC	2	18	143	30	animals	15	Kangaroo
647	11	NC	2	18	143	30	animals	16	Giraffe
647	11	NC	2	18	143	30	animals	17	Camel
647	11	NC	2	18	143	30	animals	18	Rat
647	11	NC	2	18	143	30	animals	19	Raccoon
647	11	NC	2	18	143	30	animals	20	Oppossum
647	12	NC	2	18	142	30	animals	1	Lion
647	12	NC	2	18	142	30	animals	2	Tiger
647	12	NC	2	18	142	30	animals	3	Leopard
647	12	NC	2	18	142	30	animals	4	Civet Cat
647	12	NC	2	18	142	30	animals	5	Monkey
647	12	NC	2	18	142	30	animals	6	Ape
647	12	NC	2	18	142	30	animals	7	Gorilla
647	12	NC	2	18	142	30	animals	8	Camel
647	12	NC	2	18	142	30	animals	9	Horse
647	12	NC	2	18	142	30	animals	10	Dromedary
647	12	NC	2	18	142	30	animals	11	Donkey
647	12	NC	2	18	142	30	animals	12	Mule
647	12	NC	2	18	142	30	animals	13	Dog
647	12	NC	2	18	142	30	animals	14	Cat
647	12	NC	2	18	142	30	animals	15	Lamb
647	12	NC	2	18	142	30	animals	16	Sheep
647	12	NC	2	18	142	30	animals	17	Goat
647	12	NC	2	18	142	30	animals	18	Cow
647	12	NC	2	18	142	30	animals	19	Horse
647	12	NC	2	18	142	30	animals	20	Pig
647	12	NC	2	18	142	30	animals	21	Armadillo
647	12	NC	2	18	142	30	animals	22	Coati
647	13	NC	2	18	143	30	animals	1	Beaver
647	13	NC	2	18	143	30	animals	2	Badger
647	13	NC	2	18	143	30	animals	3	Civet Cat
647	13	NC	2	18	143	30	animals	4	Lion
647	13	NC	2	18	143	30	animals	5	Tiger
647	13	NC	2	18	143	30	animals	6	Panther
647	13	NC	2	18	143	30	animals	7	Cow
647	13	NC	2	18	143	30	animals	8	Horse
647	13	NC	2	18	143	30	animals	9	Pig
647	13	NC	2	18	143	30	animals	10	Lamb
647	13	NC	2	18	143	30	animals	11	Sheep
647	13	NC	2	18	143	30	animals	12	Goat
647	13	NC	2	18	143	30	animals	13	Pony
647	13	NC	2	18	143	30	animals	14	Hippopotamus
647	13	NC	2	18	143	30	animals	15	Rhinoceros
647	13	NC	2	18	143	30	animals	16	Giraffe
647	13	NC	2	18	143	30	animals	17	Ocelot
647	14	NC	2	18	144	30	animals	1	Tiger
647	14	NC	2	18	144	30	animals	2	Lion
647	14	NC	2	18	144	30	animals	3	Ocelot
647	14	NC	2	18	144	30	animals	4	Civet Cat
647	14	NC	2	18	144	30	animals	5	Dog
647	14	NC	2	18	144	30	animals	6	Cat
647	14	NC	2	18	144	30	animals	7	Pig
647	14	NC	2	18	144	30	animals	8	Cow
647	14	NC	2	18	144	30	animals	9	Sheep
647	14	NC	2	18	144	30	animals	10	Deer
647	14	NC	2	18	144	30	animals	11	Antelope
647	14	NC	2	18	144	30	animals	12	Moose
647	14	NC	2	18	144	30	animals	13	Buffalo
647	14	NC	2	18	144	30	animals	14	Mountain Goat
647	14	NC	2	18	144	30	animals	15	Sabert
647	14	NC	2	18	144	30	animals	16	Gopher
647	14	NC	2	18	144	30	animals	17	Squirrel
647	14	NC	2	18	144	30	animals	18	Donkey
647	14	NC	2	18	144	30	animals	19	Horse
647	14	NC	2	18	144	30	animals	20	Mule
647	14	NC	2	18	144	30	animals	21	Elephant
647	14	NC	2	18	144	30	animals	22	Tiger
647	15	NC	2	18	142	30	animals	1	Dog
647	15	NC	2	18	142	30	animals	2	Cat
647	15	NC	2	18	142	30	animals	3	Mouse
647	15	NC	2	18	142	30	animals	4	Rat
647	15	NC	2	18	142	30	animals	5	Racoon
647	15	NC	2	18	142	30	animals	6	Oppossum
647	15	NC	2	18	142	30	animals	7	Rhino
647	15	NC	2	18	142	30	animals	8	Hippo
647	15	NC	2	18	142	30	animals	9	Camel
647	15	NC	2	18	142	30	animals	10	Grapl
647	15	NC	2	18	142	30	animals	11	Tiger
647	15	NC	2	18	142	30	animals	12	Loon
647	15	NC	2	18	142	30	animals	13	Kangaroo
647	15	NC	2	18	142	30	animals	14	Coati
647	15	NC	2	18	142	30	animals	15	Fox
647	15	NC	2	18	142	30	animals	16	Wolf
647	15	NC	2	18	142	30	animals	17	Coyote
647	15	NC	2	18	142	30	animals	18	Horse
647	15	NC	2	18	142	30	animals	19	Cow
647	15	NC	2	18	142	30	animals	20	Sheep
647	15	NC	2	18	142	30	animals	21	Bear
647	15	NC	2	18	142	30	animals	22	Ocelot
647	16	NC	2	18	142	30	animals	1	Cat
647	16	NC	2	18	142	30	animals	2	Lion
647	16	NC	2	18	142	30	animals	3	Dog
647	16	NC	2	18	142	30	animals	4	Bear
647	16	NC	2	18	142	30	animals	5	Seal
647	16	NC	2	18	142	30	animals	6	Sea Lion
647	16	NC	2	18	142	30	animals	7	Walrus
647	16	NC	2	18	142	30	animals	8	Tiger
647	16	NC	2	18	142	30	animals	9	Ocelot
647	16	NC	2	18	142	30	animals	10	Civet Cat
647	16	NC	2	18	142	30	animals	11	Bobcat
647	16	NC	2	18	142	30	animals	12	Elephant
647	16	NC	2	18	142	30	animals	13	Giraffe
647	16	NC	2	18	142	30	animals	14	Hippopotamus
647	16	NC	2	18	142	30	animals	15	Rhinoceros
647	16	NC	2	18	142	30	animals	16	Zebra
647	16	NC	2	18	142	30	animals	17	Donkey
647	16	NC	2	18	142	30	animals	18	Mule
647	16	NC	2	18	142	30	animals	19	Horse
647	16	NC	2	18	142	30	animals	20	Goat
647	16	NC	2	18	142	30	animals	21	Sheep
647	17	NC	2	18	141	30	animals	1	Cat
647	17	NC	2	18	141	30	animals	2	Dog
647	17	NC	2	18	141	30	animals	3	Mouse
647	17	NC	2	18	141	30	animals	4	Rat
647	17	NC	2	18	141	30	animals	5	Alpaca
647	17	NC	2	18	141	30	animals	6	Pig
647	17	NC	2	18	141	30	animals	7	Cow
647	17	NC	2	18	141	30	animals	8	Lamb
647	17	NC	2	18	141	30	animals	9	Sheep
647	17	NC	2	18	141	30	animals	10	Horse
647	17	NC	2	18	141	30	animals	11	Mule
647	17	NC	2	18	141	30	animals	12	Donkey
647	17	NC	2	18	141	30	animals	13	Giraffe
647	17	NC	2	18	141	30	animals	14	Rhinoceros
647	17	NC	2	18	141	30	animals	15	Hippopotamus
647	17	NC	2	18	141	30	animals	16	Lion
647	17	NC	2	18	141	30	animals	17	Tiger
647	17	NC	2	18	141	30	animals	18	Puma
647	17	NC	2	18	141	30	animals	19	Coyote
647	17	NC	2	18	141	30	animals	20	Wolf
647	17	NC	2	18	141	30	animals	21	Bear
647	18	NC	2	18	144	30	animals	1	Cat
647	18	NC	2	18	144	30	animals	2	Rat
647	18	NC	2	18	144	30	animals	3	Raccoon
647	18	NC	2	18	144	30	animals	4	Squirrel
647	18	NC	2	18	144	30	animals	5	Gopher
647	18	NC	2	18	144	30	animals	6	Dog
647	18	NC	2	18	144	30	animals	7	Cow
647	18	NC	2	18	144	30	animals	8	Chicken
647	18	NC	2	18	144	30	animals	9	Horse
647	18	NC	2	18	144	30	animals	10	Mule
647	18	NC	2	18	144	30	animals	11	Donkey
647	18	NC	2	18	144	30	animals	12	Sheep
647	18	NC	2	18	144	30	animals	13	Goat
647	18	NC	2	18	144	30	animals	14	Kangaroo
647	18	NC	2	18	144	30	animals	15	Camel
647	18	NC	2	18	144	30	animals	16	Tiger
647	18	NC	2	18	144	30	animals	17	Lion
647	18	NC	2	18	144	30	animals	18	Alpaca
647	18	NC	2	18	144	30	animals	19	Auslot
647	18	NC	2	18	144	30	animals	20	Civet Cat
647	18	NC	2	18	144	30	animals	21	Leopard
647	18	NC	2	18	144	30	animals	22	Giraffe
647	19	NC	2	18	143	30	animals	1	Dog
647	19	NC	2	18	143	30	animals	2	Cat
647	19	NC	2	18	143	30	animals	3	Donkey
647	19	NC	2	18	143	30	animals	4	Hippopotamus
647	19	NC	2	18	143	30	animals	5	Rhinoceros
647	19	NC	2	18	143	30	animals	6	Elephant
647	19	NC	2	18	143	30	animals	7	Giraffe
647	19	NC	2	18	143	30	animals	8	Fox
647	19	NC	2	18	143	30	animals	9	Wolf
647	19	NC	2	18	143	30	animals	10	Horse
647	19	NC	2	18	143	30	animals	11	Cow
647	19	NC	2	18	143	30	animals	12	Sheep
647	19	NC	2	18	143	30	animals	13	Lynx
647	19	NC	2	18	143	30	animals	14	Weasel
647	19	NC	2	18	143	30	animals	15	Beaver
647	19	NC	2	18	143	30	animals	16	Badger
647	20	NC	2	18	138	30	animals	1	Horse
647	20	NC	2	18	138	30	animals	2	Cow
647	20	NC	2	18	138	30	animals	3	Lamb
647	20	NC	2	18	138	30	animals	4	Sheep
647	20	NC	2	18	138	30	animals	5	Goat
647	20	NC	2	18	138	30	animals	6	Mule
647	20	NC	2	18	138	30	animals	7	Donkey
647	20	NC	2	18	138	30	animals	8	Lion
647	20	NC	2	18	138	30	animals	9	Cheetah
647	20	NC	2	18	138	30	animals	10	Elephant
647	20	NC	2	18	138	30	animals	11	Giraffe
647	20	NC	2	18	138	30	animals	12	Leopard
647	20	NC	2	18	138	30	animals	13	Ocelot
647	20	NC	2	18	138	30	animals	14	Rabbit
647	20	NC	2	18	138	30	animals	15	Cat
647	20	NC	2	18	138	30	animals	16	Dog
647	20	NC	2	18	138	30	animals	17	Llama
647	20	NC	2	18	138	30	animals	18	Pig
647	21	NC	2	18	137	30	animals	1	Cat
647	21	NC	2	18	137	30	animals	2	Dog
647	21	NC	2	18	137	30	animals	3	Mouse
647	21	NC	2	18	137	30	animals	4	Rat
647	21	NC	2	18	137	30	animals	5	Fox
647	21	NC	2	18	137	30	animals	6	Lion
647	21	NC	2	18	137	30	animals	7	Tiger
647	21	NC	2	18	137	30	animals	8	Ocerlot
647	21	NC	2	18	137	30	animals	9	Cougar
647	21	NC	2	18	137	30	animals	10	Bear
647	21	NC	2	18	137	30	animals	11	Deer
647	21	NC	2	18	137	30	animals	12	Antelope
647	21	NC	2	18	137	30	animals	13	Moose
647	21	NC	2	18	137	30	animals	14	Pony
647	21	NC	2	18	137	30	animals	15	Horse
647	21	NC	2	18	137	30	animals	16	Mule
647	21	NC	2	18	137	30	animals	17	Camel
647	21	NC	2	18	137	30	animals	18	Dog
647	21	NC	2	18	137	30	animals	19	Cat
647	22	NC	2	18	131	30	animals	1	Lion
647	22	NC	2	18	131	30	animals	2	Tiger
647	22	NC	2	18	131	30	animals	3	Egret
647	22	NC	2	18	131	30	animals	4	Elephant
647	22	NC	2	18	131	30	animals	5	Giraffe
647	22	NC	2	18	131	30	animals	6	Hippopotamus
647	22	NC	2	18	131	30	animals	7	Rhinoceros
647	22	NC	2	18	131	30	animals	8	Ocelot
647	22	NC	2	18	131	30	animals	9	Beaver
647	22	NC	2	18	131	30	animals	10	Dog
647	22	NC	2	18	131	30	animals	11	Cat
647	22	NC	2	18	131	30	animals	12	Cow
647	22	NC	2	18	131	30	animals	13	Horse
647	22	NC	2	18	131	30	animals	14	Sheep
647	22	NC	2	18	131	30	animals	15	Goat
647	22	NC	2	18	131	30	animals	16	Mouse
647	22	NC	2	18	131	30	animals	17	Rat
647	22	NC	2	18	131	30	animals	18	Civet Cat
647	23	NC	2	18	141	29	animals	1	Giraffe
647	23	NC	2	18	141	29	animals	2	Elephant
647	23	NC	2	18	141	29	animals	3	Lion
647	23	NC	2	18	141	29	animals	4	Tiger
647	23	NC	2	18	141	29	animals	5	Civet Cat
647	23	NC	2	18	141	29	animals	6	Dog
647	23	NC	2	18	141	29	animals	7	Sheep
647	23	NC	2	18	141	29	animals	8	Cow
647	23	NC	2	18	141	29	animals	9	Horse
647	23	NC	2	18	141	29	animals	10	Donkey
647	23	NC	2	18	141	29	animals	11	Pig
647	23	NC	2	18	141	29	animals	12	Dromedary
647	23	NC	2	18	141	29	animals	13	Mink
647	23	NC	2	18	141	29	animals	14	Muskrat
647	23	NC	2	18	141	29	animals	15	Beaver
647	23	NC	2	18	141	29	animals	16	Squirrel
647	24	NC	2	18	137	26	animals	1	Cow
647	24	NC	2	18	137	26	animals	2	Horse
647	24	NC	2	18	137	26	animals	3	Sheep
647	24	NC	2	18	137	26	animals	4	Elephant
647	24	NC	2	18	137	26	animals	5	Tiger
647	24	NC	2	18	137	26	animals	6	Lion
647	24	NC	2	18	137	26	animals	7	Baboon
647	24	NC	2	18	137	26	animals	8	Cheetah
647	24	NC	2	18	137	26	animals	9	Monkey
647	24	NC	2	18	137	26	animals	10	Zebra
647	24	NC	2	18	137	26	animals	11	Giraffe
647	24	NC	2	18	137	26	animals	12	Elephant
647	24	NC	2	18	137	26	animals	13	Mouse
647	24	NC	2	18	137	26	animals	14	Cat
647	24	NC	2	18	137	26	animals	15	Dog
647	24	NC	2	18	137	26	animals	16	Rat
647	25	NC	2	18	137	29	animals	1	Lion
647	25	NC	2	18	137	29	animals	2	Tiger
647	25	NC	2	18	137	29	animals	3	Gorilla
647	25	NC	2	18	137	29	animals	4	Monkey
647	25	NC	2	18	137	29	animals	5	Ocelot
647	25	NC	2	18	137	29	animals	6	Elephant
[truncated: 18,553 more rows]
